# Supplementary material for: AerChemMIP: quantifying the effects of chemistry and aerosols in CMIP6
Source: Copernicus journal article supplement (doi:10.5194/gmd-10-585-2017), 2017-02-09
Supplement: Supplementary file 1 [file AerChemMIP_CMIP6_tables-14Dec2016.xlsx]

## Sheet: log
2013-05-21
Copy the CCMVal-2 output from http://www.pa.op.dlr.de/CCMVal/DataRequests/CCMVal-2_Datarequest_FINAL.pdf
Things different from CCMVal-2:
Except for the zonal mean fields (on the following CCMVal standard pressure levels), all other fields are reported on model fields.
1000 850 700 500 400 300 250 200 170 150 130 115 100 90 80 70 50 30 20 15 10 7 5 3 2 1.5 1 0.5 0.3 0.2 0.1
2013-05-22
Add ACCMIP output from the CMOR tables (version 4) at http://www.giss.nasa.gov/projects/accmip/tables.html
The coordinate sheet is copied from the ACCMIP spread sheet.
2013-05-23
Add new output from http://www.sparc-climate.org/fileadmin/customer/6_Publications/Newsletter_PDF/40_SPARCnewsletter_Jan2013_web.pdf
The 3-D model pressure field is required for each sample of output, e.g., monthly mean pressure field is required for monthly mean output;
daily Instantaneous pressure field is required for daily Instantaneous output…
2013-05-28
Add surface hourly output
2013-06-07
Add new output
2013-06-11
Replace the hourly 3-d sheet with variables required for tropospheric OH analysis
2013-07-30
CF standard name entries highlighted in red are not yet official names
2015-05-11
The AerChemMIP data request has 2 tiers:
Tier 1: for all participants of AerChemMIP
Tier 2 (highlighted in yellow): for participants who are set-up to produce CCMI output
2016-02-03
use CMIP6 harmonized plev39 levels for zonal means
1000 925 850 700 600 500 400 300 250 200 170 150 130 115 100 90 80 70 50 30 20 15 10 7 5 3 2 1.5 1 0.7 0.5 0.4 0.3 0.2 0.15 0.1 0.07 0.05 0.03
23 Mar 2016 Michael
Tier 2 variables are removed from this worksheet, will be treated separately as tier worksheet
Note comments are merged into one cell per variable
All standard names checked against cf names on web, version 31; 8.3.2016 , eventually nearest standard name used
problems identified, variables omitted or moved to problems sheet
invalid variable names exchanged (no _)
10 April 2016 Michael
Tables named
Some few variables renamed to make consistent across tables, and with cmip5 tables
tracers added aoa_nh and nh_50
27 October 2016 Michael
plev=>pfull
pilev=>phalf
toa forcing diagnostic variables removed
tables renamed to reflect CMIP6 request
COSP output added for aerosols as 6 hourly 3d fields for AMIP period
variables for aerosol free double call to radiation added
clear sky AOT added to capture models which compute an all sky and clear-sky AOT
still todo
reduce cmip standard output, check with other MIPs
add 6 hourly backscatter and extinction for amip period
add ozone damage output
rename feedback experiments in official experiment table and paper?
indicate which variables are just needed for troposphere
check where instanteneous and averaging is needed
see if some variables are just needed for AMIP period
expand diagnostics to all DECK experiments to characterise model versions which run AerChemMIP
check that zonal and zonalvert are included in official request
put update on wiki
email update to all groups and BADC
13 Dec 2016 Michael
aerdaily changed to daily mean for most variables, but with remark on max min variables added, cell methods attribute clarified here
airdaily tau changed to cod
aer6h corrected to contain the right variables for aerosol profile validation
aerhourly sfta changed to tas
tpp removed, is the same as ptp
meanage,aoanh, nh50 underscore removed
iwp became clivi
tntsw=>tntrs ; tntlw=>tntrl
POD0 diagnostic added, upon request, no CF standard name though
wind speed added
fraction wording in notes checked
jno2 added
Annual replaced by monthly losses
UK colleagues suggested: Missing gas phase species: C2H4, HO2, H2O2, HONO, acetaldehyde (CH3CHO), N2O5, ClOx, ClO, ClONO2, BrO, NOy, Bry, Cly – as monthly 3D

## Sheet: Coordinates
	Coordinate information See HTAP appendix on model output specification (Requirements for coordinate variables) and CF metadata conventions appendix D for definition of vertical coordinates.
Variable	CF "Standard Name" (or HTAP name if CF is not available)	dimensions	output variable name	CMOR identifier	(CF) unit	(CF) comment	Example+further comments
coordinate variables
time unlimited (or record) dimension in netCDF	time	time	time	time	days since 1860-01-01 00:00	see http://www.cgd.ucar.edu/cms/eaton/cf-metadata/CF-current.html#time
center coordinates for longitudes	longitude	lon	lon	longitude	degrees_north	Longitude is positive eastward; its units of degree_east (or equivalent) indicate this explicitly. In a latitude-longitude system defined with respect to a rotated North Pole, the standard name of grid_longitude should be used instead of longitude. Grid l	An example would be -179,-178…,178,179
center coordinates for latitudes	latitude	lat	lat	latitude	degrees_east	Latitude is positive northward; its units of degree_north (or equivalent) indicate this explicitly. In a latitude-longitude system defined with respect to a rotated North Pole, the standard name of grid_latitude should be used instead of latitude. Grid la	An example is -89, -88, …,88,89
dimensionless vertical coordinate (various alternatives)	atmosphere_sigma_coordinate	lev	lev	standard_sigma	1	formula: p(n,k,j,i) = ptop + sigma(k)*(ps(n,j,i) - ptop) The following parameters (specified by the CF-standard) are also needed to fully describe this coordinate: ptop, sigma, and ps. CMOR converts these to hybrid_sigma before writing to output
	atmosphere_hybrid_sigma_pressure_coordinate	lev	lev	standard_hybrid_sigma	1	formula: p(n,k,j,i) = a(k)*p0 + b(k)*ps(n,j,i) The following parameters (specified by the CF-standard) are also needed to fully describe this coordinate: p0, ap, b, and ps.
	atmosphere_hybrid_sigma_pressure_coordinate	lev	lev	alternate_hybrid_sigma	1	formula: p(n,k,j,i) = ap(k) + b(k)*ps(n,j,i) The following parameters (specified by the CF-standard) are also needed to fully describe this coordinate: p0, ap, b, and ps. CMOR converts these to hybrid_sigma before writing to output file
	atmosphere_hybrid_height_coordinate	lev	lev	hybrid_height	m	formula: z(k,j,i) = a(k) + b(k)*orog(j,i) The following parameters (specified by the CF-standard) are also needed to fully describe this coordinate: a, b, and orog.	There is a preference to provide output on pressure levels or hybrid pressure levels to avoid interpolation issue in post-processing
additional coordinate information
sigma coordinate coefficient	atmosphere_sigma_coordinate	lev	sigma	sigma	1
sigma coordinate coefficient for layer bounds	atmosphere_sigma_coordinate	lev,2	sigma_bnds	sigma_bnds	1
hybrid sigma coordinate a coefficient	atmosphere_hybrid_sigma_coordinate	lev	a	a	1
hybrid sigma coordinate b coefficient	atmosphere_hybrid_sigma_coordinate	lev	b	b	1
hybrid sigma coordinate a coefficient for layer bounds	atmosphere_hybrid_sigma_coordinate	lev,2	a_bnds	a_bnds	1
hybrid sigma coordinate b coefficient for layer bounds	atmosphere_hybrid_sigma_coordinate	lev,2	b_bnds	b_bnds	1
alternate hybrid sigma coordinate a coefficient	atmosphere_hybrid_sigma_coordinate	lev	ap	ap	1
alternate hybrid sigma coordinate b coefficient	atmosphere_hybrid_sigma_coordinate	lev	b	b	1
alternate hybrid sigma coordinate a coefficient for layer bounds	atmosphere_hybrid_sigma_coordinate	lev,2	ap_bnds	ap_bnds	1
alternate hybrid sigma coordinate b coefficient for layer bounds	atmosphere_hybrid_sigma_coordinate	lev,2	b_bnds	b_bnds	1
hybrid height coordinate a coefficient	atmosphere_hybrid_height_coordinate	lev	az	az	1
hybrid height coordinate b coefficient	atmosphere_hybrid_height_coordinate	lev	bz	bz	1
hybrid height coordinate a coefficient for layer bounds	atmosphere_hybrid_height_coordinate	lev,2	az_bnds	az_bnds	m
hybrid height coordinate b coefficient for layer bounds	atmosphere_hybrid_height_coordinate	lev,2	bz_bnds	bz_bnds	1
reference pressure	reference_pressure_for_hybrid_sigma_pressure_coordinate	0	p0	p0	Pa
pressure at the top of the model	pressure_at_model_top_for_sigma_coordinate	0	ptop	ptop	Pa
surface pressure, time resolution corresponding to the time interval of the data	surface_air_pressure	time, lat, lon	ps	ps	Pa	The surface called "surface" means the lower boundary of the atmosphere.
surface altitude	surface_altitude	lat, lon	orog	orog	m	The surface called "surface" means the lower boundary of the atmosphere. Altitude is the (geometric) height above the geoid, which is the reference geopotential surface. The geoid is similar to mean sea level.

## Sheet: aerfixed
Time independent 2-d data (longitude, latitude)
CF standard name	Long_name	Output variable name	Units	Notes
cell_area	area of grid cell	areacella	m2
land_area_fraction	fraction of the grid cell occupied by land	sftlf	1	Please express "X_area_fraction" as the fraction of horizontal area occupied by X.
surface_altitude	surface altitude	orog	m	The surface called "surface" means the lower boundary of the atmosphere. Altitude is the (geometric) height above the geoid, which is the reference geopotential surface. The geoid is similar to mean sea level.

## Sheet: aermonthly-3d
Monthly-mean 3-d atmosphere data (longitude, latitude, model levels, time:month)
CF standard name	Long_name	Output variable name	Units	Notes
air_pressure	Air Pressure	pfull	Pa	The atmospheric pressure at the model layer midpoints for all times and levels in the associated output variables
air_pressure	air pressure at interfaces	phalf	Pa	The atmospheric pressure at the model layer interfaces for all times and levels in the associated output variables
air_temperature	Air Temperature	ta	K
specific_humidity	Specific Humidity	hus	1
geopotential_height	Geopotential Height	zg	m
eastward_wind	Eastward Wind	ua	m s-1
northward_wind	Northward Wind	va	m s-1
upward_air_velocity	Upward Air Velocity	wa	m s-1
tendency_of_air_temperature_due_to_shortwave_heating	Shortwave heating rate	tntrs	K s-1	shortwave heating rates
tendency_of_air_temperature_due_to_longwave_heating	Longwave heating rate	tntrl	K s-1	longwave heating rates
mole_fraction_of_ozone_in_air	Ozone volume mixing ratio	o3	mole mole-1
mole_fraction_of_ozone_in_air	Ozone volume mixing ratio	o3ste	mole mole-1	Ozone tracer intended to map out strat-trop exchange (STE) of ozone:
mole_fraction_of_water_vapor_in_air	Water vapour volume mixing ratio	h2o	mole mole-1
mole_fraction_of_nitrous_oxide_in_air	N2O volume mixing ratio	n2o	mole mole-1
mole_fraction_of_methane_in_air	CH4 volume mixing ratio	ch4	mole mole-1
mole_fraction_of_carbon_dioxide_in_air	CO2 volume mixing ratio	co2	mole mole-1
mole_fraction_of_hydrogen_chloride_in_air	HCl volume mixing ratio	hcl	mole mole-1
mole_fraction_of_carbon_monoxide_in_air	CO volume mixing ratio	co	mole mole-1
mole_fraction_of_nitrogen_dioxide_in_air	NO2 volume mixing ratio	no2	mole mole-1
mole_fraction_of_nitrogen_monoxide_in_air	NO volume mixing ratio	no	mole mole-1
mole_fraction_of_ethane_in_air	C2H6 volume mixing ratio	c2h6	mole mole-1
mole_fraction_of_ethyne_in_air	C2H2 volume mixing ratio	c2h2	mole mole-1
mole_fraction_of_propene_in_air	C3H6 volume mixing ratio	c3h6	mole mole-1
mole_fraction_of_propane_in_air	C3H8 volume mixing ratio	c3h8	mole mole-1
mole_fraction_of_acetone_in_air	CH3COCH3 volume mixing ratio	ch3coch3	mole mole-1
cloud_area_fraction_in_atmosphere_layer	Cloud Area Fraction	clt	1	cloud area fraction
convective_cloud_area_fraction	Convective Cloud Area Fraction	convclt	1	Convective cloud fraction
mole_fraction_of_hydroxyl_radical_in_air	OH volume mixing ratio	oh	mole mole-1
mass_fraction_of_pm10_ambient_aerosol_particles_in_air	PM10 mass mixing ratio	mmrpm10	kg kg-1
mass_fraction_of_pm2p5_dry_aerosol_particles_in_air	PM2.5 mass mixing ratio	mmrpm2p5	kg kg-1
mass_fraction_of_pm1_dry_aerosol_particles_in_air	PM1.0 mass mixing ratio	mmrpm1	kg kg-1
photolysis_rate_of_ozone_to_1D_oxygen_atom	photolysis rate of O3 to O1d	photo1d	s-1
photolysis_rate_of_nitrogen_dioxide	photolysis rate of NO2	jno2	s-1
atmosphere_mass_of_air_per_unit_area	Vertically integrated mass content of air in layer	airmass	kg m-2
mass_fraction_of_water_in_ambient_aerosol_particles_in_air	Aerosol water mass mixing ratio	mmraerh2o	kg kg-1
mass_fraction_of_particulate_organic_matter_dry_aerosol_particles_in_air	Total organic aerosol mass mixing ratio	mmroa	kg kg-1
mass_fraction_of_secondary_particulate_organic_matter_dry_aerosol_particles_in_air	Secondary organic aerosol mass mixing ratio	mmrsoa	kg kg-1
mass_fraction_of_elemental_carbon_dry_aerosol_particles_in_air	Elemental carbon mass mixing ratio	mmrbc	kg kg-1
mass_fraction_of_sulfate_dry_aerosol_particles_in_air	Aerosol sulfate mass mixing ratio	mmrso4	kg kg-1
mass_fraction_of_nitrate_dry_aerosol_particles_in_air	NO3 aerosol mass mixing ratio	mmrno3	kg kg-1
mass_fraction_of_ammonium_dry_aerosol_particles_in_air	NH4 mass mixing ratio	mmrnh4	kg kg-1
mass_fraction_of_seasalt_dry_aerosol_particles_in_air	Sea Salt mass mixing ratio	mmrss	kg kg-1
mass_fraction_of_dust_dry_aerosol_particles_in_air	Dust aerosol mass mixing ratio	mmrdust	kg kg-1
mole_fraction_of_sulfur_dioxide_in_air	SO2 volume mixing ratio	so2	mole mole-1
mole_fraction_of_isoprene_in_air	Isoprene volume mixing ratio	isop	mole mole-1
mole_fraction_of_formaldehyde_in_air	Formaldehyde volume mixing ratio	hcho	mole mole-1
mole_fraction_of_dimethyl_sulfide_in_air	DMS volume mixing ratio	dms	mole mole-1
mole_fraction_of_nitric_acid_in_air	HNO3 volume mixing ratio	hno3	mole mole-1
mole_fraction_of_peroxyacetyl_nitrate_in_air	PAN volume mixing ratio	pan	mole mole-1
tendency_of_atmosphere_moles_of_nox_expressed_as_nitrogen	layer-integrated lightning production of NOx	emilnox	mole m-2 s-1	Integrate the NOx production for lightning over model layer. proposed name: tendency_of_atmosphere_mass_content_of_nox_from_lightning
tendency_of_atmosphere_mass_content_of_sulfate_dry_aerosol_particles_due_to_gaseous_phase_net_chemical_production	Gas-phase production rate of SO4	chegpso4	kg m-2 s-1	proposed name: tendency_of_atmosphere_mass_content_of_sulfate_dry_aerosol_due_to_gas_phase_net_chemical_production
tendency_of_atmosphere_mass_content_of_sulfate_dry_aerosol_particles_due_to_aqueous_phase_net_chemical_production	Aqueous-phase production rate of SO4	cheaqpso4	kg m-2 s-1	proposed name: tendency_of_atmosphere_mass_content_of_sulfate_dry_aerosol_due_to_aqueous_phase_net_chemical_production
tendency_of_atmosphere_mole_concentration_of_ozone_due_to_chemical_production	O3 production rate	o3prod	mol m-3 s-1	ONLY provide the sum of all the HO2/RO2 + NO reactions (as k*[HO2]*[NO])
tendency_of_atmosphere_mole_concentration_of_ozone_due_to_chemical_destruction	O3 destruction rate	o3loss	mol m-3 s-1	ONLY provide the sum of the following reactions: (i) O(1D)+H2O; (ii) O3+HO2; (iii) O3+OH; (iv) O3+alkenes (isoprene, ethene,…)
tendency_of_atmosphere_moles_of_methane	Monthly Loss of atmospheric Methane	lossch4	mol m-3 s-1	monthly averaged atmospheric loss
tendency_of_atmosphere_moles_of_carbon_monoxide	Monthly Loss of atmospheric Carbon Monoxide	lossco	mol m-3 s-1	monthly averaged atmospheric loss
tendency_of_atmosphere_moles_of_nitrous_oxide	Monthly Loss of atmospheric Nitrous Oxide	lossn2o	mol m-3 s-1	monthly averaged atmospheric loss
number_concentration_of_cloud_liquid_water_particles_in_air	cloud droplet number concentration	cdnc	m-3	Cloud Droplet Number Concentration in liquid water clouds.
atmosphere_updraft_convective_mass_flux	Convective Updraft Mass Flux	mcu	kg m-2 s-1	In accordance with common usage in geophysical disciplines, "flux" implies per unit area, called "flux density" in physics. The atmosphere convective mass flux is the vertical transport of mass for a field of cumulus clouds or thermals, given by the product of air density and vertical velocity. For an area-average, cell_methods should specify whether the average is over all the area or the area o…
mass_fraction_of_cloud_liquid_water_in_air	Mass Fraction of Cloud Liquid Water	clw	kg kg-1	Includes both large-scale and convective cloud. Calculate as the mass of cloud liquid water in the grid cell divided by the mass of air (including the water in all phases) in the grid cells. Precipitating hydrometeors are included ONLY if the precipitating hydrometeors affect the calculation of radiative transfer in model.
mass_fraction_of_cloud_ice_in_air	Mass Fraction of Cloud Ice	cli	kg kg-1	Includes both large-scale and convective cloud. This is calculated as the mass of cloud ice in the grid cell divided by the mass of air (including the water in all phases) in the grid cell. It includes precipitating hydrometeors ONLY if the precipitating hydrometeors affect the calculation of radiative transfer in model.
tracer_lifetime	Tracer age of air Northern Hemisphere	aoanh	year	Fixed surface layer mixing ratio over 30°-50°N (0 ppbv), uniform fixed source (at all levels) everywhere else (source is unspecified but must be constant in space and time and documented). Note that the source could be 1yr/yr, so the tracer concentration provides mean age in years. For method using linearly increasing tracer include a method attribute: "linearly increasing tracer"For method using…
mole_fraction_of_artificial_tracer_with_fixed_lifetime_in_air	Artificial tracer with 50 day lifetime	nh50	mole mole-1	Fixed surface layer mixing ratio over 30°-50°N (100ppbv), uniform fixed 50-day exponential decay.

## Sheet: aermonthly-2d
Monthly-mean 2-d atmosphere or land surface data (longitude, latitude, time:month)
CF standard name	Long_name	Output variable name	Units	Notes
surface_air_pressure	Surface Air Pressure	ps	Pa	surface pressure (not mean sea-level pressure), 2-D field to calculate the 3-D pressure field from hybrid coordinates
tropopause_air_pressure	Tropopause Air Pressure	ptp	Pa	2D monthly mean thermal tropopause calculated using WMO tropopause definition on 3d temperature
sea_surface_temperature	Sea Surface Temperature	tos	K	this may differ from "surface temperature" in regions of sea ice.
sea_ice_area_fraction	Sea Ice Area Fraction	sic	1	fraction of grid cell covered by sea ice.
tropopause_air_temperature	Tropopause Air Temperature	tatp	K	2D monthly mean thermal tropopause calculated using WMO tropopause definition on 3d temperature
tropopause_altitude	Tropopause Altitude	ztp	m	2D monthly mean thermal tropopause calculated using WMO tropopause definition on 3d temperature
atmosphere_boundary_layer_thickness	Boundary Layer Depth	bldep	m
precipitation_flux	Precipitation	pr	kg m-2 s-1	includes both liquid and solid phases
surface_upward_latent_heat_flux	Surface Upward Latent Heat Flux	hfls	W m-2
surface_upward_sensible_heat_flux	Surface Upward Sensible Heat Flux	hfss	W m-2
leaf_area_index	leaf area index	lai	1
canopy_height	canopy height	cnpz	m
surface_snow_area_fraction	snow cover fraction	snc	1
equivalent_thickness_at_stp_of_atmosphere_ozone_content	Total Ozone Column	toz	DU	total ozone column in DU
equivalent_thickness_at_stp_of_atmosphere_ozone_content	tropospheric ozone column	tropoz	DU	tropospheric ozone column in DU, should be consistent with ptp definition of tropopause
tendency_of_atmosphere_mass_content_of_ozone_due_to_dry_deposition	dry deposition rate of o3	dryo3	kg m-2 s-1	dry deposition includes gravitational settling, impact scavenging, and turbulent deposition.
atmosphere_optical_thickness_due_to_ambient_aerosol_particles	ambient aerosol optical thickness at 550 nm	od550aer	1	AOD from ambient aerosols (i.e., includes aerosol water). Does not include AOD from stratospheric aerosols if these are prescribed but includes other possible background aerosol types. Needs a comment attribute "wavelength: 550 nm"
atmosphere_optical_thickness_due_to_ambient_aerosol_particles	ambient aerosol optical thickness at 550 nm	od550csaer	1	AOD from the ambient aerosols in clear skies if od550aer is for all-sky (i.e., includes aerosol water). Does not include AOD from stratospheric aerosols if these are prescribed but includes other possible background aerosol types. Needs a comment attribute "wavelength: 550 nm"
atmosphere_optical_thickness_due_to_ambient_aerosol_particles	ambient aerosol optical thickness at 870 nm	od870aer	1	AOD from the ambient aerosls (i.e., includes aerosol water). Does not include AOD from stratospheric aerosols if these are prescribed but includes other possible background aerosol types. Needs a comment attribute "wavelength: 870 nm"
atmosphere_optical_thickness_due_to_ambient_aerosol_particles	ambient aerosol optical thickness at 440 nm	od440aer	1	AOD from the ambient aerosls (i.e., includes aerosol water). Does not include AOD from stratospheric aerosols if these are prescribed but includes other possible background aerosol types. Needs a comment attribute "wavelength: 440 nm"
atmosphere_optical_thickness_due_to_sulfate_ambient_aerosol	sulfate aod@550nm	od550so4	1
atmosphere_optical_thickness_due_to_black_carbon_ambient_aerosol	black carbon aod@550nm	od550bc	1
atmosphere_optical_thickness_due_to_particulate_organic_matter_ambient_aerosol	total organic aerosol aod@550nm	od550oa	1	total organic aerosol AOD, comprises all organic aerosols, primary + secondary ; natural + anthropogenic including biomasss burning organic aerosol
atmosphere_optical_thickness_due_to_particulate_organic_matter_ambient_aerosol	soa aod@550nm	od550soa	1	total organic aerosol AOD due to secondary aerosol formation
atmosphere_optical_thickness_due_to_particulate_organic_matter_ambient_aerosol	bb aod@550nm	od550bb	1	total organic aerosol AOD due to biomass burning (excluding so4, nitrate BB components)
atmosphere_optical_thickness_due_to_nitrate_ambient_aerosol	nitrate aod@550nm	od550no3	1
atmosphere_optical_thickness_due_to_seasalt_ambient_aerosol	sea salt aod@550nm	od550ss	1
atmosphere_optical_thickness_due_to_dust_ambient_aerosol	dust aod@550nm	od550dust	1
atmosphere_optical_thickness_due_to_water_in_ambient_aerosol	aerosol water aod@550nm	od550aerh2o	1
atmosphere_optical_thickness_due_to_pm1_ambient_aerosol	ambient fine mode aerosol optical thickness at 550 nm	od550lt1aer	1	od550 due to particles with wet diameter less than 1 um (""ambient"" means ""wetted""). When models do not include explicit size information, it can be assumed that all anthropogenic aerosols and natural secondary aerosols have diameter less than 1 um.
atmosphere_absorption_optical_thickness_due_to_ambient_aerosol	ambient aerosol absorption optical thickness at 550 nm	abs550aer	1
tendency_of_atmosphere_mass_content_of_particulate_organic_matter_dry_aerosol_particles_due_to_net_chemical_production_and_emission	primary emission and chemical production of dry aerosol organic matter	emioa	kg m-2 s-1	This is the sum of total emission of POA and total production of SOA (emipoa+chepsoa). ""Mass"" refers to the mass of organic matter, not mass of organic carbon alone. We recommend a scale factor of POM=1.4*OC, unless your model has more detailed info available. Integrate 3D chemical production and emission field vertically to 2d field.
tendency_of_atmosphere_mass_content_of_secondary_particulate_organic_matter_dry_aerosol_particles_due_to_net_chemical_production	chemical production of dry aerosol secondary organic matter	chepsoa	kg m-2 s-1	If model lumps SOA emissions with POA, then the sum of POA and SOA emissions is reported as OA emissions. ""mass"" refers to the mass of primary organic matter, not mass of organic carbon alone.
tendency_of_atmosphere_mass_content_of_particulate_organic_matter_dry_aerosol_particles_due_to_dry_deposition	dry deposition rate of dry aerosol total organic matter	dryoa	kg m-2 s-1
tendency_of_atmosphere_mass_content_of_particulate_organic_matter_dry_aerosol_particles_due_to_wet_deposition	wet deposition rate of dry aerosol total organic matter	wetoa	kg m-2 s-1
tendency_of_atmosphere_mass_content_of_particulate_organic_matter_dry_aerosol_particles_due_to_net_chemical_production_and_emission	total emission of anthropogenic organic aerosol	emiaoa	kg m-2 s-1	anthropogenic part of emioa
tendency_of_atmosphere_mass_content_of_secondary_particulate_organic_matter_dry_aerosol_particles_due_to_net_chemical_production	total net production of anthropogenic secondary organic aerosol	chepasoa	kg m-2 s-1	anthropogenic part of chepsoa
tendency_of_atmosphere_mass_content_of_elemental_carbon_dry_aerosol_particles_due_to_emission	emission rate of black carbon aerosol mass	emibc	kg m-2 s-1	Integrate 3D emission field vertically to 2d field.
tendency_of_atmosphere_mass_content_of_elemental_carbon_dry_aerosol_particles_due_to_dry_deposition	dry deposition rate of black carbon aerosol mass	drybc	kg m-2 s-1	Dry deposition includes gravitational settling, impact scavenging, and turbulent deposition.
tendency_of_atmosphere_mass_content_of_elemental_carbon_dry_aerosol_particles_due_to_wet_deposition	wet deposition rate of black carbon aerosol mass	wetbc	kg m-2 s-1
tendency_of_atmosphere_mass_content_of_sulfur_dioxide_due_to_emission	total emission rate of so2	emiso2	kg m-2 s-1	Integrate 3D emission field vertically to 2d field.
tendency_of_atmosphere_mass_content_of_sulfate_dry_aerosol_particles_due_to_emission	total direct emission rate of so4	emiso4	kg m-2 s-1	Direct primary emission does not include secondary sulfate production. Integrate 3D emission field vertically to 2d field.
tendency_of_atmosphere_mass_content_of_dimethyl_sulfide_due_to_emission	total emission rate of dms	emidms	kg m-2 s-1	Integrate 3D emission field vertically to 2d field.
tendency_of_atmosphere_mass_content_of_sulfur_dioxide_due_to_dry_deposition	dry deposition rate of so2	dryso2	kg m-2 s-1	dry deposition includes gravitational settling, impact scavenging, and turbulent deposition
tendency_of_atmosphere_mass_content_of_sulfate_dry_aerosol_particles_due_to_dry_deposition	dry deposition rate of so4	dryso4	kg m-2 s-1	dry deposition includes gravitational settling, impact scavenging, and turbulent deposition
tendency_of_atmosphere_mass_content_of_sulfate_dry_aerosol_particles_due_to_wet_deposition	wet deposition rate of so4	wetso4	kg m-2 s-1	proposed name: tendency_of_atmosphere_mass_content_of_sulfate_dry_aerosol_due_to_wet_deposition
tendency_of_atmosphere_mass_content_of_sulfur_dioxide_due_to_wet_deposition	wet deposition rate of so2	wetso2	kg m-2 s-1
tendency_of_atmosphere_mass_content_of_ammonia_due_to_emission	total emission rate of nh3	eminh3	kg m-2 s-1	Integrate 3D emission field vertically to 2d field.
tendency_of_atmosphere_mass_content_of_ammonia_due_to_dry_deposition	dry deposition rate of nh3	drynh3	kg m-2 s-1	dry deposition includes gravitational settling, impact scavenging, and turbulent deposition
tendency_of_atmosphere_mass_content_of_ammonium_dry_aerosol_particles_due_to_dry_deposition	dry deposition rate of nh4	drynh4	kg m-2 s-1	dry deposition includes gravitational settling, impact scavenging, and turbulent deposition
tendency_of_atmosphere_mass_content_of_ammonium_dry_aerosol_particles_due_to_wet_deposition	wet deposition rate of nh4	wetnh4	kg m-2 s-1
tendency_of_atmosphere_mass_content_of_ammonia_due_to_wet_deposition	wet deposition rate of nh3	wetnh3	kg m-2 s-1
tendency_of_atmosphere_mass_content_of_nox_expressed_as_nitrogen_due_to_emission	total emission rate of nox	eminox	kg m-2 s-1	Store flux as Nitrogen. NOx=NO+NO2. Integrate 3D emission field vertically to 2d field.
tendency_of_atmosphere_mass_content_of_nox_expressed_as_nitrogen_due_to_emission	anthropogenic emission rate of nox	emianox	kg m-2 s-1	Store flux as Nitrogen. Anthropogenic fraction. NOx=NO+NO2, Includes agricultural waste burning but no other biomass burning. Integrate 3D emission field vertically to 2d field.
tendency_of_atmosphere_mass_content_of_noy_expressed_as_nitrogen_due_to_dry_deposition	dry deposition rate of noy	drynoy	kg m-2 s-1	NOy is the sum of all simulated oxidized nitrogen species out of NO, NO2, HNO3, HNO4, NO3aerosol, NO3(radical), N2O5, PAN, other organic nitrates. Dry deposition includes gravitational settling, impact scavenging, and turbulent deposition.
tendency_of_atmosphere_mass_content_of_noy_expressed_as_nitrogen_due_to_wet_deposition	wet deposition of noy incl aerosol nitrate	wetnoy	kg m-2 s-1	NOy is the sum of all simulated oxidized nitrogen species, out of NO, NO2, HNO3, HNO4, NO3aerosol, NO3(radical), N2O5, PAN, other organic nitrates.
tendency_of_atmosphere_mass_content_of_seasalt_dry_aerosol_particles_due_to_emission	total emission rate of seasalt	emiss	kg m-2 s-1
tendency_of_atmosphere_mass_content_of_seasalt_dry_aerosol_particles_due_to_dry_deposition	dry deposition rate of seasalt	dryss	kg m-2 s-1	Dry deposition includes gravitational settling, impact scavenging, and turbulent deposition.
tendency_of_atmosphere_mass_content_of_seasalt_dry_aerosol_particles_due_to_wet_deposition	wet deposition rate of seasalt	wetss	kg m-2 s-1
tendency_of_atmosphere_mass_content_of_dust_dry_aerosol_particles_due_to_emission	total emission rate of dust	emidust	kg m-2 s-1
tendency_of_atmosphere_mass_content_of_dust_dry_aerosol_particles_due_to_dry_deposition	dry deposition rate of dust	drydust	kg m-2 s-1	Dry deposition includes gravitational settling, impact scavenging, and turbulent deposition.
tendency_of_atmosphere_mass_content_of_dust_dry_aerosol_particles_due_to_wet_deposition	wet deposition rate of dust	wetdust	kg m-2 s-1
tendency_of_atmosphere_mass_content_of_carbon_monoxide_due_to_emission	total emission rate of co	emico	kg m-2 s-1	Integrate 3D emission field vertically to 2d field.
tendency_of_atmosphere_mass_content_of_carbon_monoxide_due_to_emission	total emission rate of anthropogenic co	emiaco	kg m-2 s-1	anthrophogenic emission of CO
tendency_of_atmosphere_mass_content_of_nmvoc_due_to_emission	total emission rate of nmvoc	emivoc	kg m-2 s-1	Integrate 3D emission field vertically to 2d field. _If_ fixed molecular weight of NMVOC is not available in model, please provide in units of kilomole m-2 s-1 (i.e. kg m-2 s-1 as if model NMVOC had molecular weight of 1) and add a comment to your file.
tendency_of_atmosphere_mass_content_of_biogenic_nmvoc_expressed_as_carbon_due_to_emission	total emission rate of biogenic nmvoc	emibvoc	kg m-2 s-1	Integrate 3D emission field vertically to 2d field._If_ fixed molecular weight of NMVOC is not available in model, please provide in units of kilomole m-2 s-1 (i.e. kg m-2 s-1 as if model NMVOC had molecular weight of 1) and add a comment to your file.
tendency_of_atmosphere_mass_content_of_isoprene_due_to_emission	total emission rate of isoprene	emiisop	kg m-2 s-1	Integrate 3D emission field vertically to 2d field
effective_radius_of_cloud_liquid_water_particle_at_liquid_water_cloud_top	cloud-top effective droplet radius	reffclwtop	m	Droplets are liquid only. This is the effective radius ""as seen from space"" over liquid cloudy portion of grid cell. This is the value from uppermost model layer with liquid cloud or, if available, or for some models it is the sum over all liquid cloud tops, no matter where they occur, as long as they are seen from the top of the atmosphere.TOA) each time sample when computing monthly mean. Rep…
atmosphere_mass_content_of_cloud_liquid_water	liquid water path	lwp	kg m-2
atmosphere_mass_content_of_cloud_ice	ice water path	clivi	kg m-2
planetary_albedo	planetary albedo	albs	1
surface_albedo	surface albedo	albsrfc	1
cloud_area_fraction	Total Cloud Fraction	clt	1	cloud area fraction
convective_cloud_area_fraction	Convective Cloud Area Fraction	convclt	1	Convective cloud fraction
atmosphere_optical_thickness_due_to_cloud	cloud optical depth	cod	1
number_concentration_of_cloud_condensation_nuclei_at_stp_in_air	cloud condensation nuclei concentration at liquid cloud top	ccn	m-3
air_temperature_at_cloud_top	air temperature at cloud top	ttop	K
toa_outgoing_shortwave_flux	toa outgoing shortwave radiation	rsut	W m-2	at the top of the atmosphere
toa_outgoing_shortwave_flux_assuming_clear_sky	toa outgoing clear-sky shortwave radiation	rsutcs	W m-2
toa_outgoing_longwave_flux	toa outgoing longwave radiation	rlut	W m-2	at the top of the atmosphere (to be compared with satellite measurements)
toa_outgoing_longwave_flux_assuming_clear_sky	toa outgoing clear-sky longwave radiation	rlutcs	W m-2
surface_downwelling_shortwave_flux_in_air	surface downwelling shortwave radiation	rsds	W m-2
surface_upwelling_shortwave_flux_in_air	surface upwelling shortwave radiation	rsus	W m-2
surface_downwelling_longwave_flux_in_air	surface downwelling longwave radiation	rlds	W m-2
surface_upwelling_longwave_flux_in_air	surface upwelling longwave radiation	rlus	W m-2
toa_outgoing_shortwave_flux	toa outgoing shortwave radiation	rsutca	W m-2	Flux corresponding to rsut resulting fom aerosol-free call to radiation
toa_outgoing_shortwave_flux_assuming_clear_sky	toa outgoing clear-sky shortwave radiation	rsutcsca	W m-2	Flux corresponding to rsutcs resulting fom aerosol-free call to radiation
toa_outgoing_longwave_flux	toa outgoing longwave radiation	rlutca	W m-2	Flux corresponding to rlut resulting fom aerosol-free call to radiation
toa_outgoing_longwave_flux_assuming_clear_sky	toa outgoing clear-sky longwave radiation	rlutcsca	W m-2	Flux corresponding to rlutcs resulting fom aerosol-free call to radiation
pending CF name	Phytotoxic ozone dose	pod0	mol m-2 s-1	Accumulated stomatal ozone flux over the threshold of 0 mol m-2 s-1; Computation: Time Integral of (hourly above canopy ozone concentration * stomatal conductance * Rc/(Rb+Rc) )

## Sheet: aerdaily
Daily 2-d atmosphere data (longitude, latitude, time:day) daily-mean (daily-mean = mean over 24 hours except where min max of daily values is requested)
CF standard name	Long_name	Output variable name	Units	Notes
mole_fraction_of_ozone_in_air	daily maximum O3 volume mixing ratio in lowest model layer	sfo3max	mole mole-1	maximum near-surface ozone (add cell_methods attribute "time: maximum")
air_temperature	Surface Air Temperature	tas	K	near-surface (usually, 2 meter) air temperature
surface_air_pressure	Surface Air Pressure	ps	Pa	surface pressure (not mean sea-level pressure), 2-D field to calculate the 3-D pressure field from hybrid coordinates
eastward_wind	Eastward Wind at 10 hPa	ua10	m s-1	Zonal wind on the 10 hPa surface
geopotential_height	Geopotential Height at 10 hPa	zg10	m	Geopotential height on the 10 hPa surface
geopotential_height	Geopotential Height at 100 hPa	zg100	m	Geopotential height on the 100 hPa surface
geopotential_height	Geopotential Height at 1000 hPa	zg1000	m	Geopotential height on the 1000 hPa surface
geopotential_height	Geopotential Height at 500 hPa	zg500	m	geopotential height on the 500 hPa surface
equivalent_thickness_at_stp_of_atmosphere_ozone_content	Total Column Ozone	toz	DU	total ozone column in DU
surface_downwelling_shortwave_flux_in_air	Surface Downwelling Shortwave Radiation	rsds	W m-2	surface solar irradiance for UV calculations
surface_downwelling_shortwave_flux_in_air_assuming_clear_sky	Surface Downwelling Clear-Sky Shortwave Radiation	rsdscs	W m-2	surface solar irradiance clear sky for UV calculations
surface_downwelling_longwave_flux_in_air	surface downwelling longwave radiation	rlds	W m-2
surface_upwelling_longwave_flux_in_air	surface upwelling longwave radiation	rlus	W m-2
air_temperature	Daily Minimum Near-Surface Air Temperature	tasmin	K	minimum near-surface (usually, 2 meter) air temperature (add cell_methods attribute "time: minimum")
air_temperature	Daily Maximum Near-Surface Air Temperature	tasmax	K	maximum near-surface (usually, 2 meter) air temperature (add cell_methods attribute "time: maximum")
precipitation_flux	precipitation	pr	kg m-2 s-1	includes both liquid and solid phases
atmosphere_boundary_layer_thickness	maximum PBL height	maxpblz	m	maximum boundary layer height during the day (add cell_methods attribute: "time: maximum")
atmosphere_boundary_layer_thickness	minimum PBL height	minpblz	m	minimum boundary layer height during the day (add cell_methods attribute: "time: minimum")
atmosphere_optical_thickness_due_to_cloud	cloud optical depth	cod	1
atmosphere_optical_thickness_due_to_ambient_aerosol_particles	ambient aerosol optical thickness at 550 nm	od550aer	1	AOD from the ambient aerosls (i.e., includes aerosol water). Does not include AOD from stratospheric aerosols if these are prescribed but includes other possible background aerosol types. Needs a comment attribute "wavelength: 550 nm"
eastward_wind	Eastward Near-Surface Wind	uas	m s-1
northward_wind	Northward Near-Surface Wind	vas	m s-1

## Sheet: aerhourly
Hourly 2d (longitude, latitude, time:hour)
CF standard name	Long_name	Output variable name	Units	Notes
surface_air_pressure	Surface pressure	ps	Pa	surface pressure (not mean sea-level pressure), 2-D field to calculate the 3-D pressure field from hybrid coordinates
air_temperature	Surface Temperature	tas	K	Temperature at surface
mole_fraction_of_ozone_in_air	O3 volume mixing ratio in lowest model layer	sfo3	mole mole-1
mass_fraction_of_pm2p5_ambient_aerosol_particles_in_air	PM2.5 mass mixing ratio in lowest model layer	sfpm25	kg kg-1
mole_fraction_of_nitrogen_dioxide_in_air	NO2 volume mixing ratio in lowest model layer	sfno2	mole mole-1

## Sheet: aer6hr
6-Hourly 3d (longitude, latitude, model levels, time: instanteous 6-hourly)
CF standard name	Long_name	Output variable name	Units	Notes
volume_lidar_backwards_scattering_coefficient_in_air_due_to_ambient_aerosol_particles	Aerosol backscatter coefficient	bs550aer	m-1 sr-1	Aerosol Backscatter @550nm @ 180 degrees, computed from extinction and lidar ratio
volume_extinction_coefficient_in_air_due_to_ambient_aerosol_particles	Aerosol extinction coefficient	ec550aer	m-1	Aerosol Extinction @550nm
geopotential_height	Geopotential Height at 500 hPa	zg500	m	geopotential height on the 500 hPa surface
atmosphere_relative_vorticity	Relative Vorticity at 850 hPa	rv850	s-1

## Sheet: aerzonal-vert
Monthly-mean zonal mean 2-d atmosphere or land surface data (latitude, pressure, time:month) Provide output interpolated to fixed pressure levels at:
1000 925 850 700 600 500 400 300 250 200 170 150 130 115 100 90 80 70 50 30 20 15 10 7 5 3 2 1.5 1 0.7 0.5 0.4 0.3 0.2 0.15 0.1 0.07 0.05 0.03				(interpolate first each column to fixed pressure levels, then calculate zonal mean; take into account missing values)
CF standard name	Long_name	Output variable name	Units	Notes
air_temperature	Air Temperature	ta	K
eastward_wind	Eastward Wind	ua	m s-1
northward_wind	Northward Wind	va	m s-1
geopotential_height	Geopotential Height	zg	m
age_of_stratospheric_air	Mean Age of Stratospheric Air	meanage	years	The mean age of air is defined as the mean time that a stratospheric air mass has been out of contact with the well-mixed troposphere.
mole_fraction_of_ozone_in_air	Ozone volume mixing ratio	o3	mole mole-1
mole_fraction_of_nitrous_oxide_in_air	N2O volume mixing ratio	n2o	mole mole-1
mole_fraction_of_nitric_acid_in_air	HNO3 volume mixing ratio	hno3	mole mole-1
mole_fraction_of_methane_in_air	CH4 volume mixing ratio	ch4	mole mole-1
mole_fraction_of_water_vapor_in_air	H2O volume mixing ratio	h2o	mole mole-1
mole_fraction_of_inorganic_chlorine_in_air	Total inorganic chlorine volume mixing ratio	cly	mole mole-1	Total family (the sum of all appropriate species in the model) ; list the species in the netCDF header, e.g. Cly = HCl + ClONO2 + HOCl + ClO + Cl + 2*Cl2O2 +2Cl2 + OClO + BrCl Definition: Total inorganic stratospheric chlorine (e.g., HCl, ClO) resulting from degradation of chlorine-containing source gases (CFCs, HCFCs, VSLS), and natural inorganic chlorine sources (e.g., sea salt and other aeroso…
mole_fraction_of_inorganic_bromine_in_air	Total inorganic bromine volume mixing ratio	bry	mole mole-1	Total family (the sum of all appropriate species in the model) ; list the species in the netCDF header, e.g. Bry = Br + BrO + HOBr + HBr + BrONO2 + BrCl Definition: Total inorganic bromine (e.g., HBr and inorganic bromine oxides and radicals (e.g., BrO, atomic bromine (Br), bromine nitrate (BrONO2)) resulting from degradation of bromine-containing organicsource gases (halons, methyl bromide, VSLS…
mole_fraction_of_noy_expressed_as_nitrogen_in_air	Total reactive nitrogen volume mixing ratio	noy	mole mole-1	Total family (the sum of all appropriate species in the model); list the species in the netCDF header, e.g. NOy = N + NO + NO2 + NO3 + HNO3 + 2N2O5 + HNO4 + ClONO2 + BrONO2 Definition: Total reactive nitrogen; usually includes atomic nitrogen (N), nitric oxide (NO), NO2, nitrogen trioxide (NO3), dinitrogen radical (N2O5), nitric acid (HNO3), peroxynitric acid (HNO4), BrONO2, ClONO2 add comment at…
mole_fraction_of_hydrogen_chloride_in_air	HCl volume mixing ratio	hcl	mole mole-1
mole_fraction_of_hydroxyl_radical_in_air	OH volume mixing ratio	oh	mole mole-1
mole_fraction_of_hydroperoxyl_radical_in_air	HO2 volume mixing ratio	ho2	mole mole-1

## Sheet: aerzonal
Monthly-mean 1-d atmosphere or land surface data on a certain pressure level (latitude, time:month)
CF standard name	Long_name	Output variable name	Units	Notes
northward_heat_flux_in_air_due_to_eddy_advection	Northward heat flux due to eddies	vt100	W m-2	Zonally averaged meridional heat flux at 100 hPa as monthly means derived from daily (or higher frequency) fields.
