# Supplementary material for: AerChemMIP: quantifying the effects of chemistry and aerosols in CMIP6
Source: Copernicus journal article supplement (doi:10.5194/gmd-10-585-2017), 2017-02-09
Supplement: Supplementary file 2 [file CMIP6DataRequestCompilation-AerChemMIP-Revision15Dec2016.xls]

## Sheet: Objectives
CMIP6 variables requested by MIPs: Objectives or science questions
Return completed workbook to martin.juckes@stfc.ac.uk by Jan. 31st, 2015.
MIP name:	AerChemMIP
Short name	Long Name	Description
sensitivity	climate sensitivity to NTCF forcing	Improve the characterization of NTCF forcing and associated climate sensitivity through improved understanding of historical and near future climate variability, when a better NTCF description is included in climate models. Understand how large-scale circulation respond to NTCF forcing, through improved understanding of forced responses of the coupled ocean-atmosphere system, and through improved…
forcing	estimation of NTCF radiative forcing	Improve understanding of NTCF radiative forcing and constrain related uncertainties. NTCF forcing is among the largest sources of uncertainty in historical radiative forcing .
paleo	evaluation of paleo reconstructions considering natural aerosols and NTCF gases	Characterise feedbacks and forcings of natural aerosols, biogenic emissions, fires and methane.
evaluation	evaluation against observations	Evaluate models against observations. This objective is motivated by the need to constrain forcing estimates from NTCFs.
predictability	predictability of climate response to NTCF emission measures in the near future	NTCF have the potential to impact regional climate variability and impact of different emission pathways on climate must be clarified with bigger model ensembles.
dynamics	understand atmospheric dynamics forced by NTCF	Improve understanding of the mechanism(s) underlying the dynamical atmospheric response to large NTCF perturbations.
variability	???	???

## Sheet: Experiments
		Name of MIP	Proposed Experiment Name	Tier (if your simulations are not tierd, please put 0)		Experiment Description / Design	Configuration	Start Year	End Year	# Years Per Simulation	# Ens	# Total Years	Science Question and/or Gap Being Addressed with this Experiment	Possible Synergies with other MIPs	The experimental CMIP6 design is focused on three broad scientific questions. Please rank the three science questions in order of importance for and input from your MIP for each proposed experiment (from 1-3 with 1 being most important and 0 for not relevant at all)			It is proposed to use as the scientific backdrop for CMIP6 the six WCRP Grand Challenges (GC), and an additional theme encapsulating questions related to biospheric forcings and feedbacks. Please rank the WCRP GCs and theme of collaboration in order of importance for and input from your MIP for each experiment (from 1-7 with 1 being most important and 0 for not relevant at all)							Please rank the potential benefit to the following four communnities for each experiment (from 1-4 with 1 being most important and 0 for not relevant at all)				Interested/responsible outside group	Comments
Experiment group					Number of start dates										How does the Earth System respond to forcing?	What are the origins and consequences of systematic model biases?	How can we assess future climate changes given climate variability, predictability and uncertainties in scenarios?	Clouds, Circulation and Climate Sensitivity	Changes in Cryosphere	Climate Extremes	Regional Climate Information	Regional Sea-level Rise	Water Availability	Theme for collaboration: biospheric forcings and feedbacks	Climate Modelling	Integrated Assessment Modelling	Impacts Adaptation and Vulnerability	Policy Makers
AerChemMIP-1	1	AerChemMIP	hist-piNTCF	1	1	Historical WMGHG concentrations and halocarbons emissions, 1850 NTCF emissions	AOGCM	1850	2014	165	3	495	Historical forcing attribution	DAMIP	1	2	3	1	4	3	2									complements DAMIP Hist_aer
AerChemMIP-1	2	AerChemMIP	hist-piAer	2	1	Transient historical GHG-only + NTCF precursors (aerosols radiatively active)	AOGCM	1850	2014	165	3	495	Historical forcing attribution	DAMIP	1	2	3	1	4	3	2									this requires tropospheric & stratrospheric chemistry
AerChemMIP-1	3	AerChemMIP	hist-1950HC	1	1	Historical WMGHG concentrations and NTCF emissions, 1950 halocarbons, start 1950	AOGCM	1950	2014	65	3	195	Historical forcing ERF (effective radiative forcing) estimation	RFMIP	1	2	3	1	4	3	2
AerChemMIP-2	4	AerChemMIP	histSST	1	1	Historical WMGHG concentrations and emissions	AGCM (using SST histALL)	1850	2014	165	1	165	Historical forcing ERF (effective radiative forcing) estimation	RFMIP	1	2	3	1	4	3	2
AerChemMIP-2	5	AerChemMIP	histSST-piNTCF	1	1	Historical WMGHG concentrations and halocarbons emissions, 1850 NTCF emissions	AGCM (using SST histALL)	1850	2014	165	1	165	Historical forcing ERF (effective radiative forcing) estimation	RFMIP	1	2	3	1	4	3	2
AerChemMIP-2	6	AerChemMIP	histSST-piAer	2	1	Historical WMGHG concentrations and halocarbons+ozone precursor emissions, 1850 aerosol emissions	AGCM (using SST histALL)	1850	2014	165	1	165	Historical forcing ERF (effective radiative forcing) estimation	RFMIP	1	2	3	1	4	3	2
AerChemMIP-2	7	AerChemMIP	histSST-piO3	2	1	Historical WMGHG concentrations and halocarbons+aerosol emissions, 1850 tropospheric ozone precursors emissions	AGCM (using SST histALL)	1850	2014	165	1	165	Historical forcing ERF (effective radiative forcing) estimation	RFMIP	1	2	3	1	4	3	2
AerChemMIP-2	8	AerChemMIP	histSST-1950HC	1	1	Historical WMGHG concentrations and NTCF emissions, 1950 halocarbons	AGCM (using SST histALL)	1950	2014	65	1	65	Historical forcing ERF (effective radiative forcing) estimation	RFMIP	1	2	3	1	4	3	2
AerChemMIP-2	9	AerChemMIP	histSST-piCH4	1	1	Historical WMGHG concentrations and emissions, 1850 CH4	AGCM (using SST histALL)	1850	2014	165	1	495	Historical forcing ERF estimation	RFMIP	1	2	3	1	4	3	2									this requires tropospheric & stratrospheric chemistry
AerChemMIP-2	10	AerChemMIP	histSST-piN2O	2	1	Historical WMGHG concentrations and emissions, 1850 N2O	AGCM (using SST histALL)	1850	2014	165	1	495	Historical forcing ERF estimation	RFMIP	1	2	3	1	4	3	2									this requires tropospheric & stratrospheric chemistry
AerChemMIP-3	11	AerChemMIP	ssp370-lowNTCF	1	1	As Scenariomip SSP3-7 with reduced NTCF (aerosol and tropospheric ozone precursors, including methane)	AOGCM	2015	2055	41	3	41	Future near-term climate response to NTCFs	ScenarioMIP	1	2	3	1	4	3	2
AerChemMIP-4	12	AerChemMIP	ssp370SST	1	1	Control: SSP3-7 with prescribed SST	AGCM (using SST SSP3-7)	2015	2055	41	1	41	Future near-term climate response to NTCFs	ScenarioMIP	1	2	3	1	4	3	2
AerChemMIP-4	13	AerChemMIP	ssp370SST-lowNTCF	1	1	Perturbation: SSP3-7 with reduced NTCF (aerosol and tropospheric ozone precursors, including methane)	AGCM (using SST SSP3-7)	2015	2055	41	1	41	Future near-term climate response to NTCFs	ScenarioMIP	1	2	3	1	4	3	2
AerChemMIP-4	14	AerChemMIP	ssp370SST-lowBC	1	1	Perturbation: SSP3-7 with reduced BC	AGCM (using SST SSP3-7)	2015	2055	41	1	41	Future near-term climate response to NTCFs	ScenarioMIP	1	2	3	1	4	3	2
AerChemMIP-4	15	AerChemMIP	ssp370SST-lowAer	1	1	Perturbation: SSP3-7 with reduced aerosol emissions	AGCM (using SST SSP3-7)	2015	2055	41	1	41	Future near-term climate response to NTCFs	ScenarioMIP	1	2	3	1	4	3	2
AerChemMIP-4	16	AerChemMIP	ssp370SST-lowO3	1	1	Perturbation: SSP3-7 with reduced ozone precursor emissions	AGCM (using SST SSP3-7)	2015	2055	41	1	41	Future near-term climate response to NTCFs	ScenarioMIP	1	2	3	1	4	3	2
AerChemMIP-4	17	AerChemMIP	ssp370SST-lowCH4	3	1	Perturbation: SSP3-7 with reduced methane emissions	AGCM (using SST SSP3-7)	2015	2055	41	1	41	Future near-term climate response to NTCFs	ScenarioMIP	1	2	3	1	4	3	2
AerChemMIP-4	18	AerChemMIP	ssp370SST-ssp126LU	3	1	As SSP3-7, anthropogenic aerosol and ozone precursor emissons but SSP1-2.6 land-use and associated natural emissions (biogenic VOCs, fire, dust) and surface uptake	AGCM (using SST SSP3-7)	2050	2050	10	2	20	Identify and quantify NTCF/Natural Aerosols and land-use interactions	LUMIP	1	2	3	2			3			1						Time slices TBD
AerChemMIP-5	19	AerChemMIP	piClim-control	1	1	1850 control using 1850 aerosol and ozone precursor emissions (all aerosols interact with radiation)	AGCM	1850	1850	30	1	30	Document radiative forcing for NTCFs	RFMIP	0	1	0	2			3			1
AerChemMIP-5	20	AerChemMIP	piClim-NTCF	1	1	Perturbation from 1850 control using 2014 aerosol and ozone precursor emissions	AGCM	1850	1850	30	1	30	Document radiative forcing for NTCFs	RFMIP	0	1	0	2			3			1
AerChemMIP-5	21	AerChemMIP	piClim-BC	2	1	Perturbation from 1850 control using 2014 BC emissions	AGCM	1850	1850	30	1	30	Document radiative forcing for NTCFs	RFMIP	0	1	0	2			3			1
AerChemMIP-5	22	AerChemMIP	piClim-aer	2	1	Perturbation from 1850 control using 2014 aerosol and ozone precursor emissions (only ozone (trop+strat) interact with radiation)	AGCM	1850	1850	30	1	30	Document radiative forcing for NTCFs	RFMIP	0	1	0	2			3			1
AerChemMIP-5	23	AerChemMIP	piClim-O3	2	1	Perturbation from 1850 control using 2014 aerosol and ozone precursor emissions (only ozone (trop+strat) interact with radiation)	AGCM	1850	1850	30	1	30	Document radiative forcing for WMGHG	RFMIP	0	1	0	2			3			1						simulation can be shortened to 5 years by using wind nudging
AerChemMIP-5	24	AerChemMIP	piClim-CH4	2	1	Perturbation from 1850 control using 2014 CH4 concentrations	AGCM	1850	1850	30	1	30	Document radiative forcing for WMGHG	RFMIP	0	1	0	2			3			1						simulation can be shortened to 5 years by using wind nudging
AerChemMIP-5	25	AerChemMIP	piClim-N2O	2	1	Perturbation from 1850 control using 2014 N2O concentrations	AGCM	1850	1850	30	1	30	Document radiative forcing for WMGHG	RFMIP	0	1	0	2			3			1						simulation can be shortened to 5 years by using wind nudging
AerChemMIP-5	26	AerChemMIP	piClim-HC	2	1	Perturbation from 1850 control using 2014 ODSs concentrations	AGCM	1850	1850	30	1	30	Document radiative forcing for WMGHG	RFMIP	0	1	0	2			3			1						this requires tropospheric & stratrospheric chemistry;simulation can be shortened to 5 years by using wind nudging
AerChemMIP-5	27	AerChemMIP	piClim-NOX	3	1	Perturbation from 1850 control using 2014 Nox emissions	AGCM	1850	1850	30	1	30	Document radiative forcing for NTCFs	RFMIP	0	1	0	2			3			1						this requires tropospheric & stratrospheric chemistry;simulation can be shortened to 5 years by using wind nudging
AerChemMIP-5	28	AerChemMIP	piClim-VOC	3	1	Perturbation from 1850 control using 2014 CO/VOC emissions	AGCM	1850	1850	30	1	30	Document radiative forcing for NTCFs	RFMIP	0	1	0	2			3			1						this requires tropospheric & stratrospheric chemistry;simulation can be shortened to 5 years by using wind nudging
AerChemMIP-5	28	AerChemMIP	piClim-SO2	3	1	Perturbation from 1850 control using 2014 SO2 emissions	AGCM	1850	1850	30	1	30	Document radiative forcing for NTCFs	RFMIP	0	1	0	2			3			1						this requires tropospheric & stratrospheric chemistry;simulation can be shortened to 5 years by using wind nudging
AerChemMIP-5	28	AerChemMIP	piClim-OC	3	1	Perturbation from 1850 control using 2014 Organic Carbon emissions	AGCM	1850	1850	30	1	30	Document radiative forcing for NTCFs	RFMIP	0	1	0	2			3			1						this requires tropospheric & stratrospheric chemistry;simulation can be shortened to 5 years by using wind nudging
AerChemMIP-5	28	AerChemMIP	piClim-NH3	3	1	Perturbation from 1850 control using 2014 NH3 emissions	AGCM	1850	1850	30	1	30	Document radiative forcing for NTCFs	RFMIP	0	1	0	2			3			1						this requires tropospheric & stratrospheric chemistry;simulation can be shortened to 5 years by using wind nudging
AerChemMIP-5	29	AerChemMIP	piClim-2xdust	2	1	1850 control with doubled dust emissions	AGCM	1850	2014	30	1	30	Historical forcing attribution	DAMIP	1	2	3	1	4	3	2			1						complements DAMIP Hist_aer
AerChemMIP-5	30	AerChemMIP	piClim-2xss	2	1	1850 control with doubled sea salt emissions	AGCM	1850	2014	30	1	30	Historical forcing ERF estimation	RFMIP	1	2	3	1	4	3	2			1
AerChemMIP-5	31	AerChemMIP	piClim-2xDMS	3	1	1850 control with doubled emissions of DMS	AGCM	1850	1850	30	1	30	Quantify climate and composition feedbacks involving natural emissions	PMIP	1	2	3	2			3			1						simulation can be shortened to 5 years by using wind nudging
AerChemMIP-5	32	AerChemMIP	piClim-2xfire	3	1	1850 control with doubled emissions of fires	AGCM	1850	1850	30	1	30	Quantify climate and composition feedbacks involving natural emissions	PMIP	1	2	3	2			3			1						simulation can be shortened to 5 years by using wind nudging
AerChemMIP-5	33	AerChemMIP	piClim-2xVOC	3	1	1850 control with doubled emissions of biogenic VOCs	AGCM	1850	1850	30	1	30	Quantify climate and composition feedbacks involving natural emissions	PMIP	1	2	3	2			3			1						simulation can be shortened to 5 years by using wind nudging
AerChemMIP-5	34	AerChemMIP	piClim-2xNOX	3	1	1850 control with doubled emissions of lightning Nox	AGCM	1850	1850	30	1	30	Quantify climate and composition feedbacks involving natural emissions	PMIP	1	2	3	2			3			1						simulation can be shortened to 5 years by using wind nudging
C4MIP-1	43	C4MIP	esm1pcbgc	1	1	Biogeochemically-coupled specified concentration simulation in which CO2 increases at a rate of 1% per year until quadrupling		1850	1989	140	1	140	Together with 1pctCO2 this simulation will help diagnose carbon cycle related feedbacks	OCMIP, LS3MIP	1	3	2	0	0	0	0	0	2	1
C4MIP-2	44	C4MIP	esmssp5-85	1	1	Emissions-driven future scenario simulation		2015	2100	85	1	85	This simulation will help assess the carbon cycle response to a high emissions future scenario over the 21st century	ScenarioMIP, LUMIP, OCMIP, LS3MIP	1	3	2	0	3	0	0	0	2	1
C4MIP-3	45	C4MIP	esm1pcrad	2	1	Radiatively-coupled specified concentration simulation in which CO2 increases at a rate of 1% per year until quadrupling		1850	1989	140	1	140	Together with 1pctCO2 and esm1pcbgc this simulation will help diagnose carbon cycle related feedbacks	OCMIP, LS3MIP	1	3	2	0	0	0	0	0	0	1
C4MIP-4	46	C4MIP	esmssp5-85ext	2	1	Emissions-driven future scenario simulation extension to 2300		2101	2300	200	1	200	This simulation will help assess the long-term response of the carbon cycle system (vegetation, permafrost, oceanic circulation) response to a high emissions future scenario.	ScenarioMIP, OCMIP, LS3MIP, ISMIP	1	3	2		3				2	1
C4MIP-4	47	C4MIP	esmhistbgc	2	1	Emission-driven historical simulation, biogeochemically-coupled		1850	2014	165	1	165	This simulation will help assessing carbon cycle feedbacks over the historical period 21st century in a SSP scenario. Also allow diagnose CO2 emissions induced warming	ScenarioMIP, OCMIP, LS3MIP, DAMIP	1	3	2		3				2	1
C4MIP-4	48	C4MIP	esmssp5-85bgc	2	1	Emission-driven future scenario simulation, biogeochemically-coupled		2015	2100	85	1	85	This simulation will help assessing carbon cycle feedbacks over the 21st century in a SSP scenario. Also allow diagnose CO2 emissions induced warming	ScenarioMIP, OCMIP, LS3MIP	1	3	2		3				2	1
C4MIP-4	49	C4MIP	esmssp5-85extbgc	2	1	Emission-driven future scenario simulation extension to 2300 biogeochemically-coupled		2101	2300	200	1	200	This simulation will help assessing carbon cycle feedbacks over the 22-23rd century in a SSPscenario extension to 2300.	ScenarioMIP, OCMIP, LS3MIP	1	3	2		3				2	1
CFMIP-1	50	CFMIP	amip4K	1	1	As CMIP5/CFMIP-2. AMIP experiment where SSTs are subject to a uniform warming of 4K.	Atmosphere-only	1979	2014	36	1	36	What are the physical mechanisms underlying the range of cloud feedbacks and cloud adjustments predicted by climate models, and which models have the most credible cloud feedbacks? The CMIP5/CFMIP-2 experiments enabled some progress on these questions but participation by a larger fraction of modelling groups is required in CMIP6 for a more comprehensive assessment of the uncertainties across the…		1	2	3	1	4	6	2	7	3	5	2 - Understanng cloud biases and mechanisms of cloud feedback informs priorities for model development	3 - Diagnosis of and constraints on cloud feedbacks informs IAMs	4 - Relevant to climate sensitivity and regional warming/precipitation responses	1 - Direct relevance to equilibrium climate sensitivity via cloud feedback	CFMIP community, model developers	The experiments here are all proposed for inclusion in CMIP6. CFMIP experiments include additional diagnostic outputs for understanding and evaluating cloud processes. Many of these experiments use the DECK AMIP experiment for a control and so require that these additional diagnostics are included there as well. CFMIP will also coordinate other experiments outside of CMIP6 (see accompanying docum…
CFMIP-1	51	CFMIP	amipFuture	1	1	As CMIP5/CFMIP-2. AMIP experiment where SSTs are subject to a composite SST warming pattern derived from coupled models, scaled to a global mean of 4K.	Atmosphere-only	1979	2014	36	1	36	As above		As above	As above	As above	As above	As above	As above	As above	As above	As above	As above	As above	As above	As above	As above	As above	As above
CFMIP-1	52	CFMIP	amip4xCO2	1	1	As CMIP5/CFMIP-2. AMIP experiment where SSTs are held at control values and the CO2 seen by the radiation scheme is quadrupled.	Atmosphere-only	1979	2014	36	1	36	As above	RFMIP	As above	As above	As above	As above	As above	As above	As above	As above	As above	As above	As above	As above	As above	As above	As above	As above
CFMIP-1	53	CFMIP	amip	1	11	As the output requirements for the DECK and for CFMIP are not yet agreed, it is possible that the DECK AMIP experiment will not contain all of the output diagnostics required for CFMIP. In this event we may request an additional AMIP ensemble member including additional CFMIP diagnostics, both for model evaluation and for interpretation of feedbacks and adjustments in conjunction with other CFMIP…	Atmosphere-only	1979	2014	36	1	36	As above		1	2	3	1	4	6	2	7	3	5	As above	As above	As above	As above	As above	As above
CFMIP-1	54	CFMIP	aquaControl	1	1	As CMIP5/CFMIP-2. Aquaplanet (no land) experiment with no seasonal cycle forced with specified zonally symmetric SSTs.	Atmosphere-only	1979	1988	10	1	10	As above		As above	As above	As above	As above	As above	As above	As above	As above	As above	As above	As above	As above	As above	As above	As above	As above
CFMIP-1	55	CFMIP	aqua4K	1	1	As CMIP5/CFMIP-2. Aquaplanet experiment where SSTs are subject to a uniform warming of 4K.	Atmosphere-only	1979	1988	10	1	10	As above		As above	As above	As above	As above	As above	As above	As above	As above	As above	As above	As above	As above	As above	As above	As above	As above
CFMIP-1	56	CFMIP	aqua4xCO2	1	1	As CMIP5/CFMIP-2. Aquaplanet experiment where SSTs are held at control values and the CO2 seen by the radiation scheme is quadrupled.	Atmosphere-only	1979	1988	10	1	10	As above		As above	As above	As above	As above	As above	As above	As above	As above	As above	As above	As above	As above	As above	As above	As above	As above
CFMIP-2	57	CFMIP	amipMinus4K	2	1	AMIP experiment where SSTs are subject to a uniform cooling of 4K.	Atmosphere-only	1979	2014	36	1	36	As above	PMIP	As above	As above	As above	As above	As above	As above	As above	As above	As above	As above	As above	As above	As above	As above	As above	As above
CFMIP-2	58	CFMIP	offlwamip	2	1	As CMIP5/CFMIP-2 amip experiment, but with cloud-radiative effects switched off in the LW radiation code.	Atmosphere-only	1979	2014	36	1	36	How do cloud-radiative effects impact the structure, the strength and the variability of the general atmospheric circulation in the present-day climate? How much do cloud-radiative feedbacks contribute to the spread of circulation and precipitation responses in climate change? Can we identify robust aspects of the climate response to global warming that do not depend on cloud-radiative feedbacks?	DynvVar	As above	As above	As above	As above	As above	As above	As above	As above	As above	As above	As above	As above	As above	As above	As above	As above
CFMIP-2	59	CFMIP	offlwamip4K	2	1	As CMIP5/CFMIP-2 amip4K experiment, but with cloud-radiative effects switched off in the LW radiation code.	Atmosphere-only	1979	2014	36	1	36	As above	DynVar	As above	As above	As above	As above	As above	As above	As above	As above	As above	As above	As above	As above	As above	As above	As above	As above
CFMIP-2	60	CFMIP	offlwaquaControl	2	1	As CMIP5/CFMIP-2 aquaControl experiment, but with cloud-radiative effects switched off in the LW radiation code.	Atmosphere-only	1979	1988	10	1	10	As above	DynVar	As above	As above	As above	As above	As above	As above	As above	As above	As above	As above	As above	As above	As above	As above	As above	As above
CFMIP-2	61	CFMIP	offlwaqua4K	2	1	As CMIP5/CFMIP-2 aqua4K experiment, but with cloud-radiative effects switched off in the LW radiation code.	Atmosphere-only	1979	1988	10	1	10	As above	DynVar	As above	As above	As above	As above	As above	As above	As above	As above	As above	As above	As above	As above	As above	As above	As above	As above
CFMIP-2	62	CFMIP	abruptSp4	2	1	Conceptually similar to abrupt 4xCO2 DECK experiment, except that the solar constant (not CO2) is abruptly increased by 4%.	Coupled AOGCM			150	1	150	How do responses in the climate system due to changes in solar forcing differ from changes due to CO2, and is the response sensitive to the sign of the solar forcing?	GeoMIP and SolarMIP	As above	As above	As above	As above	As above	As above	As above	As above	As above	As above	As above	As above	As above	As above	As above	As above
CFMIP-2	63	CFMIP	abruptSm4	2	1	Same as above, except solar constant is reduced by 4%	Coupled AOGCM			150	1	150	As above	GeoMIP and SolarMIP	As above	As above	As above	As above	As above	As above	As above	As above	As above	As above	As above	As above	As above	As above	As above	As above
CFMIP-3	64	CFMIP	abrupt2xCO2	2	1	Identical to the DECK abrupt4xCO2, but at 2xCO2	Coupled AOGCM			150	1	150	To what extent is regional-scale climate change per CO2 doubling state-dependent (nonlinear), and why? How does the balance of mechanisms differ for high-forcing compared to low-forcing scenarios or paleoclimate simulations?		1	2	3	4	7	6	1	3	2	5	1	2	3	4		Timing: it would make sense for this to occur when DECK experiments are run, as it builds on the DECK.
CFMIP-3	65	CFMIP	abrupt0.5xCO2	2	1	Identical to the DECK abrupt4xCO2, but at 0.5xCO2	Coupled AOGCM			150	1	150	As above	PMIP	1	2	3	4	7	6	1	3	2	5	1	2	3	4		Timing: it would make sense for this to occur when DECK experiments are run, as it builds on the DECK.
CFMIP-4	66	CFMIP	amipPiForcing	2	1	Identical to standard AMIP experiment but with constant pre-industrial forcing levels (anthro & natural)	Atmosphere-only	1979	2014	36	3	108	Allows us to diagnose time-varying forcing and feedbacks relevant to observed SST change and compare against 'long term' climate sensitivity estimates (e.g. from abrupt4xCO2). Allows us to test in principle whether climate sensitivity estimates based on recent decadal climate change are really relevant to long term climate change (i.e. the applicability of simple models that assume constant feedb…	RFMIP	2	3	1	1	4	6	2	7	3	5	2	3	4	1	As above
CFMIP-5	67	CFMIP	sstPi	2	1	Same as standard amip experiment, but with monthly-varying SSTs and sea-ice taken from a segment of each model's own piControl run.	Atmosphere-only	Year 101 of piControl	Year 120 of piControl	20	1	20	The sstPi set of experiments allow us to decompose the regional response of, for example, precipitation in each model's abrupt4xCO2 run into separate responses to each aspect of CO2 forcing (uniform SST warming, pattern SST change, increased CO2, plant physiological effect). As well as allowing regional responses in each individual model to be better understood, this set of experiments should pro…	ENSOmip	1	2	3	3	5	6	1	7	2	4	1	4	2	3	As above	Timing: The piControl and abrupt4xCO2 experiments need to be complete before the timeslice experiments can be run, as they require SST boundary conditions from these experiments.
CFMIP-5	68	CFMIP	sstPi4K	2	1	Same as sstPi but with SSTs uniformly increased by 4K	As above	As above	As above	20	1	20	As above	ENSOmip	1	2	3	3	5	6	1	7	2	4	1	4	2	3	As above	As above
CFMIP-5	69	CFMIP	sstPi4xCO2	2	1	Same as sstPi but CO2 as seen by the radiation scheme is quadrupled.	As above	As above	As above	20	1	20	As above	ENSOmip	1	2	3	3	5	6	1	7	2	4	1	4	2	3	As above	As above
CFMIP-5	70	CFMIP	sstPi4xCO2Veg	2	1	Same as sstPi but CO2 is quadrupled. The increase in CO2 is seen by both the radiation scheme and vegetation.	As above	As above	As above	20	1	20	As above	ENSOmip	1	2	3	3	5	6	1	7	2	4	1	4	2	3	As above	As above
CFMIP-5	71	CFMIP	sstPiFuture	2	1	Same as sstPi but a seasonally varying monthly mean climatology of the SST pattern anomaly taken from years 91-140 of each model's own abrupt4xCO2 minus piControl is scaled to have a global mean increase of 4K and applied.	As above	As above	As above	20	1	20	As above. Note that 50 year monthly means are used for the future pattern in order to increase the signal to noise of this pattern. For CMIP5 models the SST pattern change of years 91-140 abrupt4xCO2 is very similar to end of 21st century RCP8.5, and so these experiments should also be relevant for understanding end-of-century projections.	ENSOmip	1	2	3	3	5	6	1	7	2	4	1	4	2	3	As above	As above
CFMIP-5	72	CFMIP	sstPiTot	2	1	As sstPiFuture, but CO2 is quadrupled, and the increase in CO2 is seen by both the radiation scheme and vegetation.	As above	As above	As above	20	1	20	As above	ENSOmip	1	2	3	3	5	6	1	7	2	4	1	4	2	3	As above	As above
CFMIP-5	73	CFMIP	amipTot	2	1	Same as amip, but the SST pattern anomaly climatology from sstPiFuture is applied, scaled to have a global mean increase of 4K. CO2 is quadrupled, and the increase in CO2 is seen by both the radiation scheme and vegetation.	As above	1979	2014	36	1	36	Comparison of amipTot with TSTot allows the impact of climatological SST biases on the forced response to be assessed.	ENSOmip	1	2	3	3	5	6	1	7	2	4	1	4	2	3	As above	As above
DAMIP-1	74	DAMIP	histALL	1	1	Enlarging ensemble size of the CMIP6 hisorical simulations to at least three members	AOGCM/ESM	1850	2020	171	2	342	Combinations of histALL, histNAT and histGHG will allow us to attribute observed climate changes to contributions from GHG, the other anthropogenic factors and natural forcing. Because better signal to noise ratio is vital to D&A analyses, we request at least 3 members for all historical experiments. Larger numbers of simulations also provide much larger samples of extreme events for climate risk…	DCPP, RFMIP, GMMIP	1	3	2	4	3	2	1	6	5	7	1	4	2	3	IDAG, RFMIP, AerChemMIP, GMMIP	histALL, histNAT, histGHG, histAER, ssp585GHG and ssp585AER of DAMIP correspond closely to transient AGCM experiments for estimates of radiative forcing in RFMIP. Using these combinations of DAMIP and RFMIP experiments, we can investigate how feedbacks and adjustments vary with forcing factors.
DAMIP-1	75	DAMIP	histNAT	1	1	Historical natural-only run	AOGCM/ESM	1850	2020	171	3	513	HistALL, histNAT and histGHG simulations will allow us to attribute observed climate changes to contributions from GHG, the other anthropogenic factors and natural forcing.	C20C+, RFMIP, VolMIP, SolarMIP, GMMIP	1	3	2	4	3	2	1	6	5	7	1	4	2	3	IDAG, RFMIP, C20C+, C4MIP, VolMIP, SolarMIP, GMMIP	histALL, histNAT, histGHG, histAER, ssp585GHG and ssp585AER of DAMIP correspond closely to transient AGCM experiments for estimates of radiative forcing in RFMIP.
DAMIP-2	76	DAMIP	histGHG	1	1	Historical well-mixed GHG-only run	AOGCM/ESM	1850	2020	171	3	513	Combinations of histALL, histNAT and histGHGwill allow the quantification of climate change attributable to GHG changes, other anthropogenic forcings and natural forcings, and allow observationally-constrained TCR and TCRE to be estimated together with ssp585GHG, SSP5-8.5 (ScenarioMIP) and 1PCTCO2 (DECK)	C4MIP, RFMIP, AerChemMIP	1	3	2	3	4	2	1	6	5	7	1	4	3	2	IDAG, RFMIP, AerChemMIP, C4MIP	histALL, histNAT, histGHG, histAER, ssp585GHG and ssp585AER of DAMIP correspond closely to transient AGCM experiments for estimates of radiative forcing in RFMIP. “GHG-only with all SLCP precursors but both aerosol and ozone interacting with radiation” and “GHG-only with all SLCP precursors but only aerosol interacting with radiation” of AerChemMIP rely on the histGHG simulation of DAMIP.
DAMIP-3	77	DAMIP	histAER/histAERchem	1	1	Historical anthropogenic-Aerosols-only run	AOGCM/ESM	1850	2020	171	3	513	Together with the histNAT and histALL simulations these simulations will allow us to attribute observed climate changes to contributions from natural forcings, aerosols and “GHG+ozone+land use change”. This approach will likely result in more tightly constrained estimates of attributable warming since the aerosol response, which is more uncertain, will be directly simulated.	RFMIP, AerChemMIP	1	2	3	4	3	2	1	6	5	7	1	4	3	2	IDAG, RFMIP, AerChemMIP	histALL, histNAT, histGHG, histAER, ssp585GHG and ssp585AER of DAMIP correspond closely to transient AGCM experiments for estimates of radiative forcing in RFMIP.
DAMIP-4	78	DAMIP	ssp585GHG	2	1	Extension of well-mixed GHG-only run under SSP5-8.5	AOGCM/ESM	2021	2100	80	1	80	Combinations of histALL, histGHG, histNAT, ssp585GHG and RCP8.5 of DECK will allow us to make estimates of future temperature changes that are constrained by observed historical changes.	RFMIP, ScenarioMIP	1	3	2	3	4	2	1	6	5	7	1	3	4	2	IDAG, RFMIP, ScenarioMIP	histALL, histNAT, histGHG, histAER, ssp585GHG and ssp585AER of DAMIP correspond closely to transient AGCM experiments for estimates of radiative forcing in RFMIP.
DAMIP-5	79	DAMIP	histOZ	3	1	Historical ozone-only	AOGCM/ESM	1850	2020	171	3	513	Ozone changes have driven large changes in stratospheric temperature, and are also responsible for driving circulation changes in the Southern Hemisphere, with associated climate impacts. This simulation will allow the climate impacts of past ozone changes to be directly assessed.	AerChemMIP	1	2	3	4	3	2	1	6	5	7	1	4	3	2	IDAG, CCMI
DAMIP-6	80	DAMIP	ssp585OZ	3	1	Extension of ozone-only run under SSP5-8.5	AOGCM/ESM	2021	2100	80	1	80	This simulation will allow the climate impacts of future ozone changes to be directly assessed.	ScenarioMIP	1	3	2	4	3	2	1	6	5	7	1	4	3	2	IDAG, CCMI
DAMIP-7	81	DAMIP	histVLC	3	1	Historical volcanic-only run	AOGCM/ESM	1850	2020	171	3	513	The combination of the histNAT and histVLC simulations will allow us to separate contributions from volcanic (VLC) and solar (NAT minus VLC) forcings to historical climate change. Futhermore solar radiation management has recently attracted interest from the wide communities. histVLC will be used to validate the volcanic response simulations of models. histNAT and histVLC of DAMIP and Solaronly o…	GeoMIP, volMIP, SolarMIP	1	2	3	4	3	2	1	6	5	7	1	4	3	2	IDAG, GeoMIP, volMIP, SolarMIP
DAMIP-7	82	DAMIP	ssp585AER	3	1	Extension of aerosol-only run under SSP5-8.5	AOGCM/ESM	2021	2100	80	1	80	Combinations of histALL, histAER, histNAT, ssp585AER and SSP5-8.5 (ScenarioMIP) will allow us to make estimates of future temperature changes that are constrained by observed historical changes. Combining radiative forcing estimated from RFMIP-ERF and transient climate responses from DAMIP (histALL, histNAT, histGHG, histAER, ssp585GHG and ssp585AER), we can investigate how feedbacks and adjustme…	RFMIP, AerChemMIP, ScenarioMIP	1	2	3	4	3	2	1	6	5	7	1	4	3	2	IDAG, RFMIP, AerChemMIP, ScenarioMIP	histALL, histNAT, histGHG, histAER, ssp585GHG and ssp585AER of DAMIP correspond closely to transient AGCM experiments for estimates of radiative forcing in RFMIP.
DCPP-1	83	DCPP	DCPP-A: Decadal hindcasts	0	60	Decadal hindcasts begun each year from 1960 to present	AOGCM/ESM	1960	present (to 2019)	600	10	6000	Decadal predictability and forecast skill of forced and internally generated climate components	(direct) DAMIP, GMMIP, RFMIP, ScenarioMIP, VolMIP (indirect) C4MIP, ENSOMIP, FAFMIP, HighResMIP, LS3MIP, SIMIP, SolarMIP	2	3	1	3	3	3	1	3	2	3	2	4	1	3	WGSIP, WGCM, CLIVAR	The main result of the hindcast experiment (Component A of the DCPP) will be regional climate information concerning both the forced and internally generated components of temperature and of precipitation (this is why water availability is listed as "2"). The analysis of hindcast results, while not focused directly on the areas listed, can potentially provide some indirect information on the rema…
DCPP-1	84	DCPP	DCPP-B: Decadal forecasts	0	10	Ongoing decadal forecasts	AOGCM/ESM	present	ongoing each year	10	10	100	Quasi-operational decadal predictions and their utility for the GFCS and for applications in general	As for Component A	2	3	1	3	3	3	1	3	2	3	2	4	1	3	WGSIP, WGCM, CLIVAR	Ongoing decadal predictions, together with hindcast results, offer the possibility of useful applications in support of WMO and the GFCS
DCPP-2	85	DCPP	DCPP-C: Hiatus+	0	TBD	Mechanisms and predictability of the hiatus and of similar long timescale variations of both signs	AOGCM/ESM	TBD	TBD	0	0	0	Origin, mechanisms and predictability of long timescale variations including the current hiatus and similar variations of both signs	(direct) DAMIP, GMMIP, RFMIP, ScenarioMIP, VolMIP (indirect) ENSOMIP, LS3MIP, SIMIP, SolarMIP	2	3	1	5	2	6	1	7	4	3	1	4	2	3	WGSIP, WGCM, CLIVAR	The interest here is to understand the nature and predictability of both positive and negative long timescale variations in temperature and other quantities such as that exemplified by the current hiatus.
DCPP-3	86	DCPP	DCPP-C: Volcanoes	0	TBD	Effects of volcanoes on decadal prediction and predictability of forced and internal variability components	AOGCM/ESM	TBD	TBD	0	0	0	Effect of volcanoes on decadal variability, predictability and skill	(direct) DAMIP, GMMIP, RFMIP, ScenarioMIP, VolMIP (indirect) AeChemMIP, ENSOMIP, LS3MIP, SIMIP, SolarMIP	1	3	2	6	5	4	1	7	3	2	1	4	2	3	WGSIP, WGCM, CLIVAR	The interest here is to understand the actual and potential consequences of volcanic activity on predictions of the forced and internally generated components of temperature and other variables.
ENSOMIP-1	87	ENSOMIP	AMIPFuture4xCO2	0	1	As CMIP5/CFMIP-2. AMIP experiment where SSTs are subject to a composite SST warming pattern derived from coupled models, scaled to a global mean of 4K. And CO2 is set a 4x preindustrial	AGCM	1979	2014	36	1	36	Assess future response of climate to ENSO events including teleconnections	CFMIP	1	2	4	1	7	3	2	6	4	5	1	4	2	3	CLIVAR Pacific Panel	>1 ensemble member would be desirable to increase signal to noise. But a minimum of 1 is acceptable.
FAFMIP-1	88	FAFMIP	wind	1	1	1xCO2 experiment, parallel to piControl, forced over the ocean by surface windstress anomalies obtained from the CMIP5 ensemble mean of 1pctCO2 experiments at the time of 2xCO2	AOGCM	1	70	70	1	70	How do ocean temperature, salinity, circulation and regional sea level respond to windstress forcing? In previous work windstress forcing has been found to be the most important influence on the pattern of regional sea level change.	ISMIP6 (since both are relevant to sea level), OMIP (OGCMs could do the same experiments)
FAFMIP-1	89	FAFMIP	heat	1	1	1xCO2 experiment, parallel to piControl, forced over the ocean by surface net heat flux anomalies obtained from the CMIP5 ensemble mean of 1pctCO2 experiments at the time of 2xCO2, using a passive tracer to prevent negative climate feedback on the heat flux applied	AOGCM	1	70	70	1	70	How do ocean temperature, salinity, circulation and regional sea level respond to heat flux forcing? In previous work windstress forcing has been found to be the second most important influence on the pattern of regional sea level change, being particularly important in the north Atlantic. What processes influence ocean heat uptake efficiency? What is the effect of buoyancy forcing on the AMOC?	ISMIP6 (since both are relevant to sea level), OMIP (OGCMs could do the same experiments), any MIP interested in AMOC
FAFMIP-1	90	FAFMIP	water	1	1	1xCO2 experiment, parallel to piControl, forced over the ocean by surface net freshwater flux anomalies obtained from the CMIP5 ensemble mean of 1pctCO2 experiments at the time of 2xCO2	AOGCM	1	70	70	1	70	How do ocean interior temperature, salinity, circulation and regional sea level respond to freshwater flux forcing? What is the effect of buoyancy forcing on the AMOC?	ISMIP6 (since both are relevant to sea level), OMIP (OGCMs could do the same experiments), any MIP interested in AMOC
FAFMIP-2	91	FAFMIP	heataltcontrol	2	1	1xCO2 experiment, parallel to piControl, with control SSTs and sea ice prescribed from the piControl climatology	AOGCM	1	70	70	1	70	Required as a control for heataltanomaly.
FAFMIP-2	92	FAFMIP	heataltanomaly	2	1	1xCO2 experiment, parallel to piControl, forced over the ocean by surface net heat flux anomalies obtained from the CMIP5 ensemble mean of 1pctCO2 experiments at the time of 2xCO2, with control SSTs and sea ice prescribed from the piControl climatology to prevent negative climate feedback on the heat flux applied	AOGCM	1	70	70	1	70	How do ocean interior temperature, SST, salinity, circulation and regional sea level respond to heat flux forcing? By comparison with the heat experiment, what is the effect of ocean circulation change on the surface net heat flux?	ISMIP6 (since both are relevant to sea level)
FAFMIP-2	93	FAFMIP	all	2	1	1xCO2 experiment, parallel to piControl, forced over the ocean simultaneously by surface windstress (as in the wind experiment), net heat flux (as in the heat experiment) and net freshwater flux (as in the water experiment) anomalies obtained from the CMIP5 ensemble mean of 1pctCO2 experiments at the time of 2xCO2, using a passive tracer to prevent negative climate feedback on the heat flux appli…	AOGCM	1	70	70	1	70	Does the ocean respond linearly to the sum of perturbations in surface momentum, heat and freshwater flux anomalies?	ISMIP6 (since both are relevant to sea level)
GeoMIP-1	94	GeoMIP	G1ext	0	1	Beginning from a preindustrial control run, simultaneously quadruple the CO2 concentration and reduce the solar constant such that the TOA radiative flux remains within ±0.1 W/m2.		1850	1949	100	3	300	Assess extreme events and longer term climate varability in an idealized geoengineering scenario		1	2	3	1	4	2	3	0	5	6	1	4	2	3
GeoMIP-2	95	GeoMIP	G6sulfate	0	1	Using equatorial SO2 injection, return the radiative forcing from a background of RCP8.5 to that of RCP4.5		2020	2119	100	3	300	Assess the climate effects and inter-model variations of a limited amount of geoengineering as part of a portfolio of responses to climate change. Results to be compared with G6solar to determine differences between sulfate aerosol effects and solar irradiance effects.	VolMIP will involve similar stratospheric sulfate aerosol injections	3	2	1	1	3	4	2	0	5	6	4	3	2	1
GeoMIP-2	96	GeoMIP	G6solar	0	1	Using solar irradiance reduction, return the radiative forcing from a background of RCP8.5 to that of RCP4.5		2020	2119	100	3	300	Assess the climate effects and inter-model variations of a limited amount of geoengineering as part of a portfolio of responses to climate change. Results to be compared with G6sulfate to determine differences between sulfate aerosol effects and solar irradiance effects.		3	2	1	1	3	4	2	0	5	6	4	3	2	1
GeoMIP-3	97	GeoMIP	G7cirrus	0	1	Against a background of RCP8.5, reduce cirrus cloud optical depth by a constant amount		2020	2119	100	3	300	Assess robust model response regarding the climate effects of cirrus cloud thinning.		1	2	3	1	3	4	2	0	5	6	1	4	2	3
GMMIP-1	98	GMMIP	AMIP20C	1	1	Extended AMIP run that covers 1850-2014. All natural and anthropogenic historical forcings as used in CMIP6 Historical Simulation will be included. AGCM resolution as CMIP6 Historical Simulation. The HadISST data will be used.	AGCM	1870	2013	144	1	144	understand the roles of SST forcing and external forcings		1	2	3	2	0	4	1	0	3	0	1	4	2	3	CLIVAR/GEWEX monsoon panel,CLIVAR C20C+ project
GMMIP-2	99	GMMIP	HIST-IPO	2	1	Pacemaker 20th century historical run that includes all forcing as used in CMIP6 Historical Simulation, and the observational historical SST is restored in the tropical lobe of the IPO domain (20°S-20°N, 175°E-75°W). The HadISST data will be used.	CGCM with SST restored to the model climatology plus observational historical anomaly in the tropical lobe of IPO domain	1870	2013	144	1	144	understand the forcing of IPO-related tropical SST to global monsoon changes.																CLIVAR C20C+ project
GMMIP-2	100	GMMIP	HIST-AMO	2	1	Pacemaker 20th century historical run that includes all forcing as used in CMIP6 Historical Simulation, and the observational historical SST is restored in the AMO domain (0°-70°N, 70°W-0°)	CGCM with SST restored to the model climatology plus observational historical anomaly in the AMO domain	1870	2013	144	1	144	understand the forcing of AMO-related SST to global monsoon changes
GMMIP-3	101	GMMIP	DTIP	3	1	The topography of the TIP is modified by setting surface elevations to 500m; to understand the combined thermal and mechanical forcing of the TIP. Same model as DECK.	AGCM	1979	2013	35	1	35	understand the combined thermal and mechanical forcing of the TIP.
GMMIP-3	102	GMMIP	DTIP-DSH	3	1	Surface sensible heat released at the elevation above 500m over the TIP is not allowed to heat the atmosphere.Same model as DECK.	AGCM	1979	2013	35	1	35	compare of impact of removing thermal effects.
GMMIP-3	103	GMMIP	DHLD	3	1	The topography of the highlands in Africa, N. America and S. America TP is modified by setting surface elevations to a certain height (500m).Same model as DECK.	AGCM	1979	2013	35	1	35	understand the combined thermal and mechanical forcing of other plateaus except the TIP.
HighResMIP-1	104	HighResMIP	Forced_Atmos_Land	1	1	Forced global atmosphere-land simulations using SST and sea-ice forcings (using methodology based on Mizuta et al beyond present day), and aerosol concentrations (not emissions) to constrain model spread, with RCP4.5 or similar for the projected forcings	HIGH and LOW (e.g. 25km and 60-100km resolution)	1951	2050	100	6	600	Assess impact and robustness of enhanced model resolution on process representation and impact on future projections using the same SST/sea-ice forcing	AMIP, CMIP6	2	1	3	1	5	3	4	0	2	6	1	0	2	3
HighResMIP-2	105	HighResMIP	Coupled	2	1	Pairs of coupled integrations, one with constant 1950's forcing (CTL) and one with historic and then RCP4.5 (as in Forced_Atmos_Land, EXP).	HIGH and LOW (e.g. 25km and 60-100km resolution)	1951	2050	100	6	600	Assess impact and robustness of enhanced model resolution on process representation and impact on future projections in coupled system	CMIP6, HighResMIP_ForcedAtmos_Land	2	1	3	1	5	3	4	6	2	7	1	0	2	3
HighResMIP-3	106	HighResMIP	Forced_Atmos_Land_2100	3	1	Extend Forced_Atmos_land to 2100 with agreed forcings	HIGH and LOW (e.g. 25km and 60-100km resolution)	2051	2100	50	6	600	To give a stronger signal to noise ratio	HIGH and LOW (e.g. 25km and 60-100km resolution)	2	1	3	1	5	3	4	0	2	6	1	0	2	3
HighResMIP-4	107	HighResMIP	Aqua_planet	3	1	Aqua planet simulation				0	0	0	To enable more straight forward interpretation of impact of resolution on model physics and dynamical behaviour
HighResMIP-4	108	HighResMIP	Switch_on_4XCo2	3	1	Switch on 4XCo2				0	0	0	To enable assessment of possible changes in climate extremes and in climate sensitivity due to improved resolution which cannot be simulated well by the DECK-counterpart.
ISMIP6-1	109	ISMIP6	piControlwithism	1	1	Pre-industrial control simulation that includes interactive ice sheets.	AOGCM-ISM	1850	2300	451	1	500	Same purpose as traditional Pre-industrial control (baseline for analysis, estimate unforced variability of model, diagnose drift due to ice sheets, initial condition for other experiment). Science question/Gap: Assess systematic biases		2	1	3		1						2	4	3	1	CliC	This experiment will also use the standard DECK pre-industrial control from any model taking part in CMIP6 and will have an equivalent experiment for standalone ice sheet models.
ISMIP6-2	110	ISMIP6	1pctCo2withism	1	1	Idealized 1%/yr CO2 increase to 4xC02 over 140yrs and kept constant at 4xCO2 for an additional 200 to 400 yrs simulation that includes interactive ice sheets.	AOGCM-ISM	From piControlwithism	As long as possible (350 or 500)	350	1	350	Same purpose as traditional 1%/yr to 4x preindustrial C02 (measure transient climate sensitivity, evaluate model response and feedback due to ice sheets under idealized forcing). Science question/Gap: Assess impacts and feedbacks due to ice sheets and uncertainty in scenario.	LS3MIP	1	3	2	2	1	6	3	4	5	7	2	4	3	1	CliC	This experiment will also use the standard DECK 1% CO2 to quadrupling CO2 from all climate models participating in CMIP6 and a standalone ice sheet experiment forced by the standard DECK output, in order to investigate the feedbacks introduced by dynamic ice sheets.
ISMIP6-3	111	ISMIP6	ssp5-8.5withism	2	1	Future climate from ScenarioMIP SSP5-8.5 simulation that includes includes interactive ice sheets. Set up would follow the standard SSP5-8.5 experiment, and therefore may first require that the Historical Simulation is performed first with a coupled AOGCM-ISM setting	AOGCM-ISM	2015	2300	286	1	286	Same purpose as ScenarioMIP SSP5-8.5 (future estimate of anthropogenic climate change and its implication for sea-level change, evaluate impact of dynamic ice sheets cf traditional SSP5-8.5). Science question/Gap: Obtain future sea-level projection and uncertainty in future climate change. Note that SSP5-8.5 will be the focus of our projections with standalone ice sheet models.	ScenarioMIP, HighResMIP, CORDEX, Obs4MIP, ana4MIP, LS3MIP	1	3	2	5	1	6	4	2	3	7	4	3	2	1	CliC	This experiment will also use the standard SSP5-8.5 from all climate models participating in this ScenarioMIP experiment and a standalone ice sheet experiment forced by the standard DECK output. To assess model bias and the uncertainty in the sea-level projections arising from ice sheet models, there will be a series of standalone ice sheet simulations. To evaluate the uncertainty arising from th…
LS3MIP-1	112	LS3MIP	LMIP-Hist	1	1	Land only simulations	LND	1850	2014	165	1	165	Land reanalysis	LUMIP
LS3MIP-2	113	LS3MIP	LMIP-Fut	2	1	Land only simulations	LND	2015	2100	86	3	258	Climate trend analysis	ScenarioMIP
LS3MIP-3	114	LS3MIP	LFMIP-Hist-AOGCM	1	1	Prescribed land conditions 1980-2014 climate	LND-ATM-OC	1980	2100	121	1	121	diagnose land-climate feedback including ocean response	ScenarioMIP
LS3MIP-4	115	LS3MIP	LFMIP-Hist-AOGCM	2	1	Prescribed land conditions 1980-2014 climate	LND-ATM-OC	1980	2100	121	4	484	diagnose land-climate feedback including ocean response	ScenarioMIP
LS3MIP-4	116	LS3MIP	LFMIP-Hist-AGCM	2	1	Prescribed land conditions 1980-2014 climate; SSTs prescribed	LND-ATM	1980	2100	121	5	605	diagnose land-climate feedback over land	ScenarioMIP
LS3MIP-5	117	LS3MIP	LFMIP-AOGCM	1	1	Prescribed land conditions 30yr running mean	LND-ATM-OC	1980	2100	121	1	121	diagnose land-climate feedback including ocean response	ScenarioMIP
LS3MIP-6	118	LS3MIP	LFMIP-AOGCM	2	1	Prescribed land conditions 30yr running mean	LND-ATM-OC	1980	2100	121	4	484	diagnose land-climate feedback including ocean response	ScenarioMIP
LS3MIP-6	119	LS3MIP	LFMIP-AGCM	2	1	Prescribed land conditions 30yr running mean; SSTs prescribed	LND-ATM	1980	2100	121	5	605	diagnose land-climate feedback over land	ScenarioMIP
LS3MIP-6	120	LS3MIP	LFMIP-P	2	1	Initialized pseudo-observations land	LND-ATM-OC	1980	2014	35	10	350	land-related seasonal predictability	Historic runs
LUMIP-1	121	LUMIP	LND_noLULCC_hist	1	1	Historical land only simulation with land use held at 1850; no human activity; derivative of LMIP-hist (LS3MIP)	LND	1850	2014	165	1	165	Assess land use change impact on historic water, energy, carbon fluxes; Benchmark land model response to LULCC	C4MIP, LMIP, LS3MIP, DAMIP	1	2	0	0	0	3	4	0	2	1	1	2	0	0	GSWP3, TRENDY	Requires LND_ALLFORCE_hist potential DECK expt that is in LS3MIP (LMIP) proposal
LUMIP-2	122	LUMIP	CPL_1%DF	1	1	Idealized 1% or 2% (TBD) per year global deforestation with all other forcings held constant	GCM	1850	1980	130	1	130	Assess coupled model response to land cover change in idealized setting; Identify what amount of deforestation required to see signal relative to noise	C4MIP	1	3	2	0	0	0	3	0	2	1	1	0	2	0		Starts from some point in pre-industrial control ; extension of 50+ years beyond full deforestation so can also look at equilibrium response; compare to pre-industrial control
LUMIP-3	123	LUMIP	LND_DF, ATM_DF, CPL_DF	3	1	Paired idealized timeslice control and deforestation experiments for specific regions (tropical, boreal, temperate?, TBD)	LND, ATM, GCM	1980	2010	31	1	120	Idealized experiments designed to assess response to land cover change in specific regions		1	0	2	0	0	3	2	0	0	1	1	4	2	3	LUCID, LUC4C	These experiments have been proposed for LUC4C/LUCID experiment. LUMIP may identify most interesting LUC4C/LUCID and repeat for CMIP6 with broader set of models
LUMIP-4	124	LUMIP	LND_COVER/MANAGE	2	1	Factorial set of land only experiments with increasingly realistic treatment of land management; derivatives of LMIP-hist (LS3MIP)	LND	1850	2014	165	10	1650	Assess relative impact of land cover and incrementally more comprehensive land management change on land to atmosphere fluxes of water, energy, and carbon; forced with historical observed climate	ScenarioMIP	1	3	2	0	0	4	2	0	3	1	1	2	3	4		See LUMIP proposal for factorial list of experiments: includes grasscrop, wood harvest, pasture, crop, crop-irrigation, crop-irrigation-fertilization; possibly could be extended to 2100
LUMIP-5	125	LUMIP	CPL_noLULCC_hist_conc	1	1	Same as CMIP6 historical but with land cover held at 1850, no human activity	GCM	1850	2014	165	1	165	Assess impact of historic land use change on climate, extremes, and carbon cycle	DAMIP, C4MIP	1	2	3	0	0	3	2	0	4	1	1	0	2	0		# ensembles recommendation should be same as D&A recommendation for single factor experiments
LUMIP-6	126	LUMIP	CPL_noLULCC_hist_emis	3	1	Same as esmhistorical (C4MIP) but with land cover held at 1850, no human activity	ESM	1850	2014	165	1	165	Assess total impact (biogeophysical and biogeochemical) of historic land use change; along with paired concentration runs, can assess biogeophysical vs biogeochemical impact of land use change	C4MIP	1	2	0	0	0	3	2	0	4	1	1	0	2	0		Requires CPL_ALLFORCE_hist_conc
LUMIP-7	127	LUMIP	CPL_landpolicy_fut_emis	1	1	Additional land mitigation policy sensitivity simulations for a high and a low RF scenario, keep all forcings the same as control, only swap land use from another RCP-SSP scenario with strongly different land use; emissions driven runs if possible; alternative land use scenarios selected to focus on afforestation vs deforestation; derivatives of esmssp7 / esmssp2.6 (C4MIP)	ESM	2015	2100	95	2	190	Sensitivity simulation to evaluate how strongly different future land use trajectories for a particular RF target affect climate regionally and globally	ScenarioMIP, C4MIP, LS3MIP	1	0	2	0	0	3	2	0	4	1	1	3	4	2		Specfic land use scenario / RCP-SSP combination depends on core ScenarioMIP runs; up to 3 ensemble members per RCP-SSP combo
LUMIP-8	128	LUMIP	CPL_landpolicy_fut_emis	2	1	Additonal ensemble members for one of the land policy scenarios; coordinate with ScenarioMIP/C4MIP if possible to coincide with ScenarioMIP SSP with additional ensemble members	ESM	2015	2100	95	2	190		ScenarioMIP, C4MIP
LUMIP-9	129	LUMIP	CPL_noLULCC_fut_emis	2	1	Same as esmssp7 / esmssp2.6 (C4MIP)except with land use held constant at 2015 levels; done for same two scenarios as in CPL_landpolicy_fut_emis; emissions driven if possible	ESM	2015	2100	95	2	190	Evaluate impact of projected land use change on climate	C4MIP, ScenarioMIP	1	0	2	0	0	3	2	0	4	1	1	3	4	2		Treatment of human activities such as fire suppression, ignition, wood harvest be treated needs to be considered carefully for final experimental design
OCMIP6-1	130	OCMIP6	OCN_CFC_SF6	1	1	Ocean only simulation of CFC12 and SF6 to validate simulated circulation of CMIP5 ocean model components	OCN	1930	2014	85	1	85	Validate simulated circulation fields	C4MIP	3	1	3	2	7	7	7	7	7	4	1	2	3	3		Forced simulations will be made as part of OCMIP6; it would be beneficial to adopt these runs for CMIP6 (for equivalent forced vs. Coupled comparison)
OCMIP6-2	131	OCMIP6	OCNGBC_FORCE_hist	1	1	Ocean only simulations forced with reanalysis data (CORE) in same ocean biogeochemical model	OCN	1850	2014	165	1	165	Assess how total variability of the same ocean dynamical- biogeochemical model varies when forced (CORE reanalysis) vs. When used in coupled mode (CMIP6)	C4MIP	1	3	2	3	7	1	3	0	0	2	1	4	2	3
OCMIP6-2	132	OCMIP6	OCNGBC_FORCE_ctrl	1	1	Same as OCNBGC_FORCE_hist but with constant preindustrial atmospheric CO2 (xCO2= 280 ppm)	OCN	1850	2014	165	1	165	Assess intrinsic variability of same ocean dynamical- biogeochemical model, comparing CORE forced (repeated normal year forcing) vs. coupled results (CMIP6)	C4MIP	1	3	2	3	7	1	3	0	0	2	1	4	2	3
OMIP-1	133	OMIP	CORE-II	1	1	Global ocean - sea-ice coupled experiment forced with the Coordinated Ocean - ice Reference Experiments inter-annually varying atmopsheric data sets for the 1948-2009 period. The 62-year forcing period is repeated for no less than 5 cycles.	Global ocean - sea-ice coupled	1	310	310	1	310	Evaluation, understanding, and improvements of ocean models, including assessment of systematic biases	OCMIP, DCPP	3	1	2	4	3	0	2	1	0	5	1	0	0	0	CLIVAR OMDP	Provides a standard protocol for integration of global ocean - sea-ice models. In the spirit of AMIP, the OMIP can be considered as part of future DECK experiments.
PDRMIP-1	134	PDRMIP	PDR_FULL_	1	1	Changes in precipitation from various drivers of climate change. Dedicated simulations with CO2, CH4, solar irradiance changes and different aerosol types, to investigate the degree of difference in mean and extreme precipitation between the drivers. Combination of slab ocean/full ocean and fixed SST. Also, perturb aerosols regionally, to investigate the precipitation impact of the longitudinal s…	AOGCM	~2000	NA	100	1	600	PDRMIP will compare the precipitation response to various climate drivers, across models. Analyses planned include a better understanding of the drivers’ importance for inter-model differences in precipitation changes, energy budget analysis and extremes related to precipitation.	RFMIP, AerChemMIP	1	2	3	1	0	2	4	0	3	0	1	0	2	0
PDRMIP-2	135	PDRMIP	PDR_FULL_	2	1	Regional simulations	AOGCM	~2000	NA	100	1	600	PDRMIP will compare the precipitation response to various climate drivers, across models. Analyses planned include a better understanding of the drivers’ importance for inter-model differences in precipitation changes, energy budget analysis and extremes related to precipitation.	RFMIP, AerChemMIP	1	2	3	1	0	2	4	0	3	0	1	0	2	0
PDRMIP-2	136	PDRMIP	PDR_fsst_	2	1	Fixed SST simulations	AOGCM	~2000	NA	30	1	180	PDRMIP will compare the precipitation response to various climate drivers, across models. Analyses planned include a better understanding of the drivers’ importance for inter-model differences in precipitation changes, energy budget analysis and extremes related to precipitation.	RFMIP, AerChemMIP	1	2	3	1	0	2	4	0	3	0	1	0	2	0
PMIP-1	137	PMIP	Last glacial maximum (lgm)	1	1	main forcings : ice-sheet; trace gases, orbital parameters, dust	ESM	from PI or pre-existing LGM	as long as possible to have >= 100 stabilised years (I.e 500 to 1000 years for the simulation)	100	1	100	response to climate forcing : trace gases, ice-sheet, natural aerosols ; role of feedbacks (ocean, sea-ice, vegetation, snow, clouds…) systematic biases : benchmarking (with comparison with results of previous PMIP phases PMIP1, 2, 3)	CFMIP, C4MIP, scenarios, GOMD, chemistry/aerosols	1	3	2	1	3	6	4	5	7	2	1	0	2	3	CLIVAR, PAGES, CLIC projects Biodiscovery (ecological and niche models)	protocol already available; foreseen improvements / CMIP5: interactive vegetation, aerorols feedback analyses on clouds regional assessment / paleoclimate observations initial state for planned transient deglaciation experiments in PMIP
PMIP-2	138	PMIP	Mid Holocene (midHolocene)	1	1	main forcings : trace gases, orbital parameters, dust	ESM	from PI or pre-existing midHolocene	about 300 to 1000 for interannual variability	200	1	200	response to climate forcing : insolation, trace gases, natural aerosols ; role of feedbacks (ocean, sea-ice, vegetation, snow, clouds…) hydrological cycle (monsoon, ITCZ, transports) systematic biases : benchmarking (with comparison with results of previous PMIP phases PMIP1, 2, 3) relationship between changes in mean state and interannual to multidecadal variability	CFMIP, C4MIP, scenarios, GOMD, chemistry/aerosols	1	2	3	1	5	4	3	7	6	2	1	0	2	3	CLIVAR, PAGES, projects Biodiscovery (ecological and niche models)	protocol already available; foreseen improvements / CMIP5: interactive vegetation, aerorols feedback analyses on clouds analyse and evaluation of climate "short term" variability regional assessment / paleoclimate observations
PMIP-3	139	PMIP	Last millennium (past1000)	1	1	main forcings : trace gases, volcanoes, solar variability, land use	ESM	850	1850	1000	1	1000	natural variability response to forcing detection/attribution, predictability extremes	C20C, land use, decadal prediction forcing MIP ??	1	3	2	4	5	2	3	7	6	1	1	4	2	3	Detection/Attribution CLIVAR, PAGES	protocol already available Required improvements / CMIP5: consistency of past1000 and historical forcings (trace gases, land use etc….) so that past 1000 can be used as a spinup for historical runs
PMIP-4	140	PMIP	Mid Pliocene (PlioExp)	1	1	main forcings : trace gases, orography, ice-sheet	ESM	from PI or pre-existing PlioExp	as long as possible to have >= 100 stabilised years (I.e 500 )	100	1	100	1 How does the Earth System respond in the long term to CO2 forcing analogous to that of the modern? 2 What is the significance of CO2 induced polar amplification for the stability of the ice sheets, sea-ice and sea-level? What is the nature of an equilibrium climate state at 400 ppmv CO2?	CFMIP, scenarios, ice sheet MIP (PlioISMIP)	1	3	2	1	3	6	4	5	7	2	1	0	2	3	CLIVAR,PAGES,CliC	protocol already tested within the PlioMIP and PMIP3 projects reconstructions collected as a long-term effort by USGS
PMIP-5	141	PMIP	Last Interglacial (LIG)	1	1	main forcings : orbital parameters, ice-sheet, trace gases	ESM	from PI or pre-existing LIG	as long as possible to have >= 100 stabilised years (I.e 500 )	100	1	100	Evaluation of the models' ability to represent Arctic warmth, Sensitivity of Greenland ice sheet to this warmth, impact on ocean and basal melting of West Antarctic Ice Sheet.	CFMIP, C4MIP, scenarios, GOMD, chemistry/aerosols	1	2	3	5	2	6	4	3	7	1	1	0	2	3	CLIVAR/PAGES/CLiC	protocol already tested in PAST4FUTURE EU project, planned multi-millenial experiments in PMIP possible test for climate-ice-sheet coupled models (in discussion with ISMIP)
RFMIP-1	142	RFMIP	RFMIP-IRF-GHG	1	1	Offline radiation calculations with specified surface and atmospheric conditions. No clouds or aerosols.	Offline-rad	0	0	0	0	0	Instantaneous radiative flux and forcing calculations at PI, PD, PI+4xCO2, PI+4K, and "future" (temperature and CO2 increases). Reference calculations to be provided.	Core	1	2	3	1	7	4	2	5	6	3	1	2	0	3		Requires off-line radiative transfer code. Computational costs are negligible.
RFMIP-1	143	RFMIP	RFMIP-IRF-AER	1	1	Request for specialized diagnostics: Full snapshots of spectrally-resolved aerosol optical properties for single days at PI and PD, along with model-specific direct aerosol IRF.	Diagnostic	0	0	0	0	0	Quantification of diversity in aerosol optical properties. Allows for accurate diagnosis of diversity and application of reference models.	AerChemMIP	1	2	3	1	7	4	2	5	6	3	1	2	0	3	Joint with AeroCom	Specialized diagnostics
RFMIP-2	144	RFMIP	RFMIP-IRF-CO2	2	1	Offline radiation calculations varying CO2 from 0.5x to 8x PI values	Offline-rad	0	0	0	0	0	Assess accuracy of model parameterizations across a range of CO2 concentrations relevant to past (e.g. LGM), future states, and forcing experiements.	Core	1	2	3	1	7	4	2	5	6	3	1	2	0	3		Requires off-line radiative transfer code. Computational costs are negligible.
RFMIP-2	145	RFMIP	RFMIP-IRF-IndGas	2	1	Offline radiation calculations varying one greenhouse gas at a time.	Offline-rad	0	0	0	0	0	Assess accuracy of model parameterizations of absorption by individiaul greenhouse gases	Core	1	2	3	1	7	4	2	5	6	3	1	2	0	3		Requires off-line radiative transfer code. Computational costs are negligible.
RFMIP-3	146	RFMIP	RFMIP-ERF-PI-Cntrl	1	1	30-year atmosphere only integration using preindustrial conditions. Interactive vegetation	Atmos only, fixed SST/ice	1	30	30	1	30	Baseline for model-specific effective radiative forcing (ERF) calculations	Core	1	2	3	1	7	4	2	5	6	3	1	2	0	3
RFMIP-3	147	RFMIP	RFMIP-ERF-4xCO2	1	1	As in RFMIP-ERF-PI-Cntrl but with 4xCO2	Atmos only, fixed SST/ice	1	30	30	1	30	Quantifty ERFof 4xCO2	Core	1	2	3	1	7	4	2	5	6	3	1	2	0	3
RFMIP-3	148	RFMIP	RFMIP-ERF-Anthro	1	1	As in RFMIP-ERF-PI-Cntrl but with present-day anthropogenic forcing (greenhouse gases, aerosols and land-use)	Atmos only, fixed SST/ice	1	30	30	1	30	Quantify ERF of PD total anthropegenic forcing	DAMIP, AerChemMIP	1	2	3	1	7	4	2	5	6	3	1	2	0	3
RFMIP-3	149	RFMIP	RFMIP-ERF-GHG	1	1	As in RFMIP-ERF-PI-Cntrl but with present-day greenhouse gases	Atmos only, fixed SST/ice	1	30	30	1	30	Quantify ERF of PD forcing by well-mixed greenhouse gases	DAMIP, AerChemMIP	1	2	3	1	7	4	2	5	6	3	1	2	0	3
RFMIP-3	150	RFMIP	RFMIP-ERF-AER	1	1	As in RFMIP-ERF-PI-Cntrl but with with present-day aerosols and ozone	Atmos only, fixed SST/ice	1	30	30	1	30	Quantify ERF of PD forcing by aerosols and ozone	AerChemMIP	1	2	3	1	7	4	2	5	6	3	1	2	0	3
RFMIP-3	151	RFMIP	RFMIP-ERF-LU	1	1	As in RFMIP-ERF-PI-Cntrl but with present-day land use	Atmos only, fixed SST/ice	1	30	30	1	30	Quantify ERF of PD by land use changes	LUMIP	1	2	3	1	7	4	2	5	6	3	1	2	0	3
RFMIP-4	152	RFMIP	RFMIP-ERF-AERx0.1	2	1	As in RFMIP-ERF-AER but with present-day changes scaled by 0.1	Atmos only, fixed SST/ice	1	30	30	1	30	Explore forcing impacts of non-linearity of cloud-aerosol interactions	AerChemMIP	1	2	3	1	7	4	2	5	6	3	1	2	0	3
RFMIP-4	153	RFMIP	RFMIP-ERF-AERx2	2	1	As in RFMIP-ERF-AER but with present-day changes scaled by 2	Atmos only, fixed SST/ice	1	30	30	1	30	Explore forcing impacts of non-linearity of cloud-aerosol interactions	AerChemMIP	1	2	3	1	7	4	2	5	6	3	1	2	0	3
RFMIP-4	154	RFMIP	RFMIP-ERF-HistALL	2	1	Time-varying forcing. SST and sea ice fixed at preindustrial control. Interactive vegetation	Atmos only, fixed SST/ice	1850	2100	251	3	753	Quantify transient forcing from all agents	DAMIP	1	2	3	1	7	4	2	5	6	3	1	2	0	3		Matched to coupled AOGCM requests from DAMIP to allow consistent diagnosis of forcing and response
RFMIP-4	155	RFMIP	RFMIP-ERF-HistNAT	2	1	Time-varying forcing from volcanos, solar variability, etc. SST and sea ice fixed at preindustrial control. Interactive vegetation	Atmos only, fixed SST/ice	1850	2100	251	3	753	Quantify transient forcing from natural agents	DAMIP	1	2	3	1	7	4	2	5	6	3	1	2	0	3		Matched to coupled AOGCM requests from DAMIP to allow consistent diagnosis of forcing and response
RFMIP-4	156	RFMIP	RFMIP-ERF-HistAER	2	1	Time-varying forcing by aerosols. SST and sea ice fixed at preindustrial control. Interactive vegetation	Atmos only, fixed SST/ice	1850	2100	251	3	753	Quantify transient forcing from aerosols	DAMIP	1	2	3	1	7	4	2	5	6	3	1	2	0	3		Matched to coupled AOGCM requests from DAMIP to allow consistent diagnosis of forcing and response
RFMIP-4	157	RFMIP	RFMIP-ERF-HistGHG	2	1	Time-varying forcing by GHGs. SST and sea ice fixed at preindustrial control. Interactive vegetation	Atmos only, fixed SST/ice	1850	2100	251	3	753	Quantify transient forcing from well-mixed greenhouse gases	DAMIP	1	2	3	1	7	4	2	5	6	3	1	2	0	3		Matched to coupled AOGCM requests from DAMIP to allow consistent diagnosis of forcing and response
RFMIP-5	158	RFMIP	RFMIP-Hist-All	1	1	Prescribed anthropogenic aerosol optical properties. All forcings.	Coupled	1850	2020	171	4	684	Which aspects of the historical record emerge consistently when anthropogenic aerosols are tightly contrained? Is the historical record consistent with large (< 1 W/m2) aerosol forcing?	DAMIP	1	2	3	1	7	4	2	5	6	3	1	2	0	0	WCRP/Easy Aerosol	Corresponds to DECK experiement with spectrally-dependent anthropogenic aerosols optical properties specified as spatially-varying pattern with time-varying strength.
RFMIP-6	159	RFMIP	RFMIP-Hist-Nat	2	1	Prescribed anthropogenic aerosol optical properties. Natural forcings.	Coupled	1850	2020	171	4	684	Allow for detection and attribution experiements with prescribed aerosols	DAMIP
RFMIP-6	160	RFMIP	RFMIP-Hist-Aer	2	1	Prescribed anthropogenic aerosol optical properties. Changes in aerosols only.	Coupled	1850	2020	171	4	684	Allow for detection and attribution experiements with prescribed aerosols	DAMIP
RFMIP-6	161	RFMIP	RFMIP-Hist-FixedSST	2	1	Prescribed anthropogenic aerosol optical properties. All forcings.	Coupled	1850	2020	171	4	684	Quantify model-specific effective radiative under prescribed-aerosol conditions	DAMIP
RFMIP-7	162	RFMIP	RFMIP-Hist-AMIP	3	1	Prescribed anthropogenic aerosol optical properties, prescribed time-varying SSTs	Atmos-only	1980	2020	41	4	164	Assess model biases when constrained to observed conditions	DAMIP																Corresponds to DECK experiement with specified anthropogenic aerosols
RFMIP-7	163	RFMIP	RFMIP-Hist-AMIP-Nudged	3	1	Prescribed anthropogenic aerosol optical properties, prescribed time-varying SSTs, winds nudged to reanalysis	Atmos-only, nudged	1980	2020	41	4	164	Assess model biases when very tightly constrained to observed conditions	CFMIP
ScenarioMIP-1	164	ScenarioMIP	SSP5_85	1	1	Future scenario with high radiative forcing by the end of century. Following approximately RCP8.5 global forcing pathway but with new forcing based on SSP5. Concentration-driven.	AOGCM/ESM	2015	2100	86	1	86	Climate reponse to updated plausible high forcing scenario, to provide climate information to support integrated research on impacts, mitigation, and adapation.	C4MIP, DAMIP, GeoMIP, ISMIP6, RFMIP	2	0	1	7	6	3	1	4	5	2	1	1	1	2		Requesting additional ensemble members for this scenario as part of Tier 2.
ScenarioMIP-2	165	ScenarioMIP	SSP5_85	2	1	Additional ensemble members for future scenario with high radiative forcing by the end of century. Following approximately RCP8.5 global forcing pathway but with new forcing based on SSP5. Concentration-driven.	AOGCM/ESM	2015	2100	86	9	774	Climate reponse to updated plausible high forcing scenario, to provide climate information to support integrated research on impacts, mitigation, and adapation. Additional ensemble members to allow characterization of variability that can be applied to other scenarios as well.		2	0	1	7	6	3	1	4	5	2	1	1	1	2		Additional ensemble members beyond the Tier 1 request for a single member for this scenario.
ScenarioMIP-3	166	ScenarioMIP	SSPX_60	1	1	Future scenario with medium radiative forcing by the end of century. Following approximately RCP6.0 global forcing pathway but with new forcing based on SSP. Concentration-driven.	AOGCM/ESM	2015	2100	86	1	86	Climate reponse to updated plausible medium forcing scenario, to provide climate information to support integrated research on impacts, mitigation, and adapation.	GeoMIP	2	0	1	7	6	3	1	4	5	2	1	1	1	2
ScenarioMIP-3	167	ScenarioMIP	SSP1_26	1	1	Future scenario with low radiative forcing by the end of century. Following approximately RCP2.6 global forcing pathway but with new forcing based on SSP1. Concentration-driven.	AOGCM/ESM	2015	2100	86	1	86	Climate reponse to updated plausible low forcing scenario, to provide climate information to support integrated research on impacts, mitigation, and adapation.	LUMIP, AerChemMIP, C4MIP	2	0	1	7	6	3	1	4	5	2	1	1	1	2
ScenarioMIP-4	168	ScenarioMIP	SSP3_70	2	1	Future scenario with high radiative forcing by the end of century. Reaches about 7.0 W/m2 by 2100; fills gap in RCP forcing pathways between 6.0 and 8.5 W/m2. Concentration-driven.	AOGCM/ESM	2015	2100	86	1	86	Climate reponse to plausible high forcing scenario not represented by RCPs, to provide climate information to support integrated research on impacts, mitigation, and adapation.	LUMIP, AerChemMIP	2	0	1	7	6	3	1	4	5	2	1	1	1	2
ScenarioMIP-4	169	ScenarioMIP	SSPX_45	2	1	Future scenario with medium radiative forcing by the end of century. Following approximately RCP4.5 global forcing pathway but with new forcing based on SSP. Concentration-driven.	AOGCM/ESM	2015	2100	86	1	86	Climate reponse to updated plausible medium forcing scenario, to provide climate information to support integrated research on impacts, mitigation, and adapation.		2	0	1	7	6	3	1	4	5	2	1	1	1	2
ScenarioMIP-4	170	ScenarioMIP	SSP4_37	2	1	Future scenario with low radiative forcing by the end of century. Reaches about 3.7 W/m2 by 2100; fills gap in RCP forcing pathways between 4.5 and 2.6 W/m2. Concentration-driven.	AOGCM/ESM	2015	2100	86	1	86	Climate reponse to plausible low forcing scenario not represented by RCPs, to provide climate information to support integrated research on impacts, mitigation, and adapation.		2	0	1	7	6	3	1	4	5	2	1	1	1	2
ScenarioMIP-4	171	ScenarioMIP	SSPX_Y_ext	2	1	Extension of one or more scenario described above beyond 2100, likely to 2300. Number and type of extensions remain to be specified. We assume three scenarios here as a placeholder.	AOGCM/ESM	2101	2300	199	3	597	Climate reponse to updated long-term forcing scenario, to investigate response of earth system components with long response times and to inform long-term impact studies.	ISMIP6, C4MIP	2	0	1	7	6	3	1	4	5	2	1	1	1	2
ScenarioMIP-4	172	ScenarioMIP	SSPX_Y_over	2	1	Overshoot scenario relative to one of the scenarios described above. This scenario will only be carried out in ScenarioMIP if it is not included in the design of another MIP (e.g. C4MIP or GeoMIP).	AOGCM/ESM	2015	2100	86	1	86	Climate reponse to forcing overshoot scenario, to investigate response of earth system to decreasing forcing and to provide climate information to support integrated research on impacts, mitigation, and adapation.	C4MIP, GeoMIP	2	0	1	7	6	3	1	4	5	2	1	1	1	2
SolarMIP-1	173	SolarMIP	Solaronly	1	1	Historical solar-only transient simulation using settings from CMIP6 historical simulation but fixed GHG&ODS (1850 level)	AOGCM/ESM	1850	2020	171	3	513	Assess solar-only effects, separate solar and volcanic effects, additional output to clarify importance of radiation, ozone (interactive or prescribed) and stratospheric dynamics for solar signals	DAMIP, VolMIP, DCPP, AerChemMIP, Diagnostic MIP DynVar	1	2	0	2	3	4	1	3	0	0	1	3	0	4	WCRP/SPARC SOLARIS-HEPPA
SolarMIP-2	174	SolarMIP	futureSolarMin	1	1	Future simulation using solar forcing running into a new Dalton/Maunder Minimum type	AOGCM/ESM	2014	2200	186	2	165	Assess impact of future grand solar minimum for climate change under increasing GHG & ODS concentrations	DAMIP, DCPP, AerChemMIP,Diagnostic MIP DynVar, ScenarioMIP	2	3	1	2	3	2	1	3	0	0	1	3	3	3	WCRP/SPARC SOLARIS-HEPPA
SolarMIP-3	175	SolarMIP	NRLSens	2	1	sensitivity experiment using a different spectral solar irradiance (NRLSSI) forcing than the CMIP6 historical simulation	AOGCM/ESM	1850	2014	165	1	165	assess uncertainty in solar SSI forcing and generate reference for earlier CMIP5 experiments (all using NRLSSI)	DAMIP, DCPP, AerChemMIP,Diagnostic MIP DynVar	2	1	3	2	3	4	1	3	0	0	1	3	0	4	WCRP/SPARC SOLARIS-HEPPA
VolMIP-1	176	VolMIP	VolLongS100EQ	1	1	Idealized equatorial eruption corresponding to an initial emission of 100 Tg of SO2. This eruption has a magnitude roughly corresponding to the 1815 Tambora eruption, the largest historical tropical eruption, which was linked to the so-called “year without a summer” in 1816	AOGCM/ ESM	Preindustrial conditions	TBD	20	9	180	Uncertainty in the climate response to strong volcanic eruptions, with focus on coupled ocean -atmosphere feedbacks and interannual to decadal global as well as regional responses. The mismatch between reconstructed and simulated climate responses to historical strong volcanic eruptions, with focus on the role of simulated background internal climate variability.	PMIP,DCPP.DAMIP
VolMIP-1	177	VolMIP	VolShort20EQfull	1	1	1991 Pinatubo forcing as used in the CMIP6 historical simulations. Requires special diagnostics of parameterized and resolved wave forcings, radiative and latent heating rates. A large number of ensemble members is required to address internal atmospheric variability.	AOGCM/ ESM	Preindustrial conditions	TBD	3	25	75	Uncertainty in the climate response to strong volcanic eruptions with focus on short-term response. Robustness of volcanic imprints on Northern Hemisphere’s winter climate and of associated dynamics.	DYNVAR,DCPP,RFMIP,DAMIP
VolMIP-2	178	VolMIP	VolLongS100HL	2	1	Idealized high-latitude (60°N) eruption emitting 100 Tg of SO2 over five months. The eruption’s strength and length roughly correspond to that of the 1783-84 Laki eruption.	AOGCM/ ESM	Preindustrial conditions	TBD	20	9	180	Uncertainty in climate response to strong high-latitude volcanic eruptions (focus on coupled ocean-atmosphere). Laki has a unique eruption style (large SO2 mass releases occurred at short temporal intervals). Outstanding questions about the magnitude of the climatic impact of high-latitude eruptions.	PMIP, GeoMIP,DCPP
VolMIP-2	179	VolMIP	VolLongC19thC	2	1	Early 19th century cluster of strong tropical volcanic eruptions, including the 1809 event of unknown location, and the 1815 Tambora and 1835 Cosigüina eruptions.	AOGCM/ ESM	Preindustrial conditions	TBD	50	3	150	Uncertainty in the multi-decadal climate response to strong volcanic eruptions (focus on long-term climatic implications). Contribution of volcanic forcing to the climate of the early 19th century, the coldest period in the past 500 years. Discrepancies between simulated and reconstructed climates of the early 19th century.	PMIP, GeoMIP,DCPP,DAMIP
VolMIP-2	180	VolMIP	VolShort20EQsurf	2	1	As VolShort20EQfull, but with prescribed surface cooling patterns or net surface flux changes. Complimentary experiment to VolShort20EQstrat.	AOGCM/ ESM	Preindustrial conditions	TBD	3	25	75	Mechanism(s) underlying the dynamical atmospheric response to large volcanic eruptions, in particular in Northern Hemisphere’s winters. The experiment considers only the effect of volcanically induced surface cooling.	DYNVAR,DCPP,RFMiP
VolMIP-2	181	VolMIP	VolShort20EQstrat	2	1	As VolShort20EQfull, but with prescribed aerosol heating in the stratosphere. Complimentary experiment to VolShort20EQstrat.	AOGCM/ ESM	Preindustrial conditions	TBD	3	25	75	Mechanism(s) underlying the dynamical atmospheric response to large volcanic eruptions, in particular in Northern Hemisphere’s winter. The experiment considers only the effect of volcanically-induced stratospheric heating.	DYNVAR, DCPP,RFMIP
VolMIP-3	182	VolMIP	VolShort20EQslab	3	1	As VolShort20EQfull, but with a slab ocean	AOGCM/ ESM	Preindustrial conditions	TBD	3	25	75	Effects of volcanic eruptions on ENSO dynamics.	ENSOMIP, DCPP
VolMIP-3	183	VolMIP	VolShort20EQini/DCPP C2.1	3	1	As VolShort20EQfull, but as decadal prediction runs joint experiment with DCPP	AOGCM/ ESM	Preindustrial conditions	TBD	10	10	100	Influence of large volcanic eruptions in future climate. Influence of large volcanic eruptions on seasonal and decadal climate predictability	DCPP
										17136	432	40139

## Sheet: Request scoping
CMIP6 variables requested by MIPs: Output request scoping
This sheet brings together the 3 major components of the work book: objectives, variable groups and experiment groups (note that each of the DECK experiments is treated as a group). Each row in the data entry portion of the sheet describes a request for data consisting of variables from a variable group and giving a specified number of years and ensemble members for each experiment group.																	hist-*		histSST*		ssp370-*		ssp370SST*		piClim*
Return completed workbook to martin.juckes@stfc.ac.uk by Jan. 31st, 2015.							CMIP DECK Experiments											Experiment Groups									Other MIPs (if output from experiments in other MIPs is needed)
Definition of variables			Preferred grid	Objectives (listed in column G) could be met with regridded data:	comments	objectives served	control		AMIP		abrupt4xCO2		1pctCO2		CMIP6 historical		AerChemMIP-1		AerChemMIP-2		AerChemMIP-3		AerChemMIP-4		AerChemMIP-5		MIP name:	SSP370	1
Short name of variable group	Selection method	Selection option					number of sims.	# of yrs per sim.	number of sims.	# of yrs per sim.	number of sims.	# of yrs per sim.	number of sims.	# of yrs per sim.	number of sims.	# of yrs per sim.	number of sims.	# of yrs per sim.	number of sims.	# of yrs per sim.	number of sims.	# of yrs per sim.	number of sims.	# of yrs per sim.	number of sims.	# of yrs per sim.	number of expts	number of sims	# of yrs per sim
Amon	all		native				3	165	1	36	1	150	1	150	3	165	9	all	7	all	3	41	7	all	19	30	1	3	41
Lmon	all		native				3	165	1	36	1	150	1	150	3	165	9	all	7	all	3	41	7	all	19	30	1	3	41
Limon	all		native				3	165	1	36					3	165	9	all	7	all	3	41	7	all	19	30
Omon	all		native				3	165			1	150	1	150	3	165	9	all			3	41					1	3	41
Oyr	all		native				3	165							3	165	9	all			3	41					1	3	41
SIday	all		native				3	165							3	165	9	all			3	41					1	3	41
SImon	all		native				3	165			1	150	1	150	3	165	9	all			3	41					1	3	41
cfMon	all		native				3	165	1	36	1	150	1	150	3	165	9	all	7	all	3	41	7	all	19	30	1	3	41
cfSites	all		native				3	165	1	36					3	165	9	all									1	3	41
aerfixed	all		native				1	1	1	1					1	1	1	1	1	1	1	1	1	1	1	1	1	3	1
aermonthly-3d	all		native				3	165	1	36					3	165	9	all	7	all	3	41	7	all	19	30	1	3	41
aermonthly-2d	all		native				3	165	1	36					3	165	9	all	7	all	3	41	7	all	19	30	1	3	41
aerdaily	all		native						1	36					3	165	9	all	7	all	3	41	7	all			1	3	41
aerhourly	all		native						1	36					3	165					3	41	7	all			1	3	41
aer6hr	all		native						1	36
aerzonal-vert	all		native				3	165	1	36					3	165	9	all	7	all	3	41			2	30	1	3	41
aerzonal	all		native				3	165	1	36					3	165	9	all	7	all	3	41			2	30	1	3	41

## Sheet: New variables
CMIP6 variables requested by MIPs: Variables
	This sheet provides for the definition of variables which have not been previously used in CMIP5, CCMI, CORDEX or SPECS. If you are unsure, you can enter a variable here and the WIP will check.
Short name	CF standard_name	standard name status	Native grid	units	Long Name	description/comments	Priority	associated observational dataset
tas95	air_temperature	exists	atmos	K	95th percentile of daily temperature	This is just an example entry .. note that observational datasets should be defined in http://goo.gl/forms/LBN9yninxS .	3	ERBE
Insert additional rows as needed

## Sheet: New Variable Groups
	Enter details of new variables below, one row per variables. See section 3.5 of guidance document for details. A new sheet should be created for each variable group: an new group is needed whenever the output requirements for the variables is expected to be different (e.g. if some variables will only be needed in a small number of experiments or for a selected set of years, put them in a separate…
Short name of group	Variable short name	Table	Frequency	Description extension (optional)	Shape	Levels	Time mean, point or climatology	Mask (optional)

## Sheet: __lists__
Selection Methods	Variable groups	Grids	Realms	Yes/No	Masks	Frequency	Native grids
all	Oclim	native	atmos	Yes	land	yr	atmos
shape	Oyr	200km	ocean	No	sea	mon	ocean
priority	Amon	100km	land	Maybe	ice	monClim	land
list	Omon_3d	50km	landIce		Sea-ice	day	ice
none	Omon_oth	25km	seaIce		Land-ice	6hr	other
	Lmon	10km	aerosol		Nat-veg	3hr	other
	LImon		atmosChem		2nd-veg	other
	OImon		ocnBgchem		crops	other
	aero_oth				pasture	other
	aero_3d				urban	other
	day_ss				lake	other
	day_oth				glacier
	6hrLev				other
	6hrPlev				other
	3hr				other
	cfMon_3dstd				other
	cfMon_2dmod				other
	cfMon_3dmod				other
	cfMon_sim				other
	cfOff
	cfDay_2d
	cfDay_3d
	cf3hr_grid
	cf3hr_sim
	cfSites
	CCMI1_annual
	CCMI1_daily
	CCMI1_fixed
	CCMI1_hourly
	CCMI1_monthly
	SPECS_6hr
	SPECS_Amon
	SPECS_day
	SPECS_fx
	SPECS_grids
	SPECS_Lmon
	SPECS_OImon
	SPECS_Omon
	CORDEX_3h
	CORDEX_6h
	CORDEX_day
	CORDEX_fx
	CORDEX_grids
	CORDEX_mon
	CORDEX_sem

## Sheet: aerchemmip-changelog
2.2.16	MichaelSchulz	NTCFRESP-SSP3-7 experiment removed, since its double
2.2.16	MichaelSchulz	ambiguous # of years 165/65 and 41/10 replaced "all"
