# Supplementary material for: AerChemMIP: quantifying the effects of chemistry and aerosols in CMIP6
Source: Copernicus journal article supplement (doi:10.5194/gmd-10-585-2017), 2017-02-09
Supplement: Supplementary file [file gmd-10-585-2017-supplement-title-page.pdf › gmd-10-585-2017-supplement-title-page.pdf]

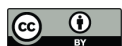

## *Supplement of*

# **AerChemMIP: quantifying the effects of chemistry and aerosols in CMIP6**

**William J. Collins et al.**

*Correspondence to:* William J. Collins ([w.collins@reading.ac.uk](mailto:w.collins@reading.ac.uk))

- [gmd-10-585-2017-supplement-title-page.pdf](#)
- [AerChemMIP\\_CMIP6\\_tables-14Dec2016.xlsx](#)
- [CMIP6DataRequestCompilation-AerChemMIP-Revision15Dec2016.xls](#)

The copyright of individual parts of the supplement might differ from the CC-BY 3.0 licence.
